# Supplementary material
Source: PubMed Central journal article supplement (PMC3241895)
Supplement: NIHMS339610-supplement-1.pdf [file NIHMS339610-supplement-1.pdf]

## Supplement Material

**Tissue fixation and immunohistochemical analysis:** Following intubation, the chest was opened and the heart was perfusion fixed for 2 minutes at 120 mmHg with 4% paraformaldehyde (Sigma, St. Louis, MO) in phosphate buffered saline (PBS) via left ventricular stab (a right atrial defect provided the egress for blood and fluid). Fixed hearts were immersed in 30% sucrose overnight, embedded into OCT (TissueTek), frozen, and prepared into 10-micron thick frozen sections. Anti-GFP (rabbit polyclonal conjugated to Alexa Fluor 488, Invitrogen) and anti-troponin I or anti-connexin (rabbit polyclonal, Santa Cruz Biotechnology) staining was carried out. Primary antibodies were used at dilutions of 1:200 (anti-GFP) and 1:100 (anti-troponin I and connexin). Secondary biotinylated anti-rabbit (Invitrogen) antibody was used for troponin-I and connexin, and then visualized with streptavidin Alexa Fluor 555 (Invitrogen). Confocal microscopy was performed on a Leica SP5 confocal system (Leica, Wetzlar, Germany).

**Bioluminescence imaging of BMMC transplantation:** The bioluminescent imaging system consists of a super sensitive, cooled (-90° C) CCD camera mounted onto a light-tight imaging chamber. The CCD chip is 2.7 cm<sup>2</sup>, and consists of 2048 x 2048 pixels at 13.5 microns each. The camera is capable of detecting a minimum radiance of 100 photons/second/cm<sup>2</sup>/steradian and can achieve a minimal image pixel resolution of 50 microns. The system does not allow for 3-dimensional imaging, hence spatial resolution is limited to a compressed, 2 dimensional image for analysis. Images were acquired using 1-10 minute intervals until peak signal was observed. BLI was quantified by creation of polygonal regions of interest (ROIs) by a technician (blinded to the experimental groups) over the precordium. Cell signal was reported in units of average photons per second per centimeter square per steradian (photons/s/cm<sup>2</sup>/sr).

**Validation of BLI by PCR analysis of BMMC-injected hearts *ex vivo*:** For *ex vivo* validation of BLI, a standard curve was first generated by correlating cycle counts from real-time polymerase chain reaction probing for the male *Sry* gene in female hearts injected with known numbers of male BMMCs. Female animals receiving male BMMCs (n=8), were then imaged at various time points, followed by immediate harvest of the heart-cell complex for DNA extraction and RT-PCR for *Sry*. Cycle count results were then correlated with *in vivo* BLI signal strength by linear regression analysis. Correlation of BLI signal to cell number was achieved by extrapolation from the standard curve analysis of PCR cycle count to the known numbers of injected cells.

**Positron emission tomography (PET) analysis:** Regions of interest (ROIs) were drawn (by a technician blinded to the treatment groups) over the anterolateral wall (horizontal view). The counts per pixel per minute were converted to counts per milliliter per minute with a calibration constant obtained from scanning a cylindrical phantom. The ROI counts per milliliter per minute were converted to counts per gram per minute (assuming a tissue density of 1 g/mL) and divided by the injected dose to obtain an image ROI-derived [<sup>18</sup>F]-FDG percentage injected dose per gram of heart (% ID/g) as previously described <sup>1</sup>.

**Echocardiographic determination of left ventricular contractility:** Echocardiography was performed using the General Electric Vivid 7 Dimension imaging system equipped with a 13 MHz linear probe (GE, Milwaukee, MI). Mice receiving BMMC (n=20) or PBS (n=22) following I/R injury were assessed pre-operatively, 2, 4 and 6 weeks post-operatively. Animals

were induced with isoflurane, placed supine, and received continuous inhaled anesthetic (1.5-2%) for the duration of the imaging session. Echocardiography was performed by two independent operators (blinded to the animal treatment groups), and M-mode short axis views of the LV were obtained. Analysis of the M-mode images was performed by a blinded technician using built-in GE analysis software.

**Flow cytometry analysis:**  $1 \times 10^6$  BMDCs were incubated with 1  $\mu$ l monoclonal antibody specific for CD31, CD34, CD45, CD11b, sca-1, CD44, CD28, flk-2, Thy1.1, or c-kit (BD, San Jose, CA) in 2% FBS/PBS at 4°C for 30 min and analyzed by FACSCalibur with Cellquest software (BD, San Jose, CA).

**Invasive cardiovascular hemodynamics:** Animals receiving either BMDC (n=15) or PBS (n=13) following I/R injury were assayed 6-weeks following surgery. Simultaneous measurements of pressure and volume were obtained using a specialized conductance catheter (Millar Instruments, Houston, Texas). Animals were induced and maintained with inhaled isoflurane (1-2%) in 100% oxygen. Mice were intubated and ventilated at a tidal volume of 200  $\mu$ l at 100 breaths per minute (Harvard Apparatus, Holliston, MA). The internal jugular vein was cannulated with PE-10 tubing and a 10% albumin solution infused at 5  $\mu$ l/min. The right carotid artery was next cannulated with the pressure-volume catheter which was advanced retrograde across the aortic valve to lie along the long axis of the left ventricle. The temperature of the mice was constantly monitored by a rectal probe and maintained at 37° C by a self-regulating heating pad (Fine Science Tools, San Francisco, CA). After baseline loops were recorded, occlusion

parameters were recorded during and after three 5-second manual occlusions of the inferior vena cava (via transabdominal approach).

## **REFERENCES**

1. Toyama H, Ichise M, Liow JS, Vines DC, Seneca NM, Modell KJ, Seidel J, Green MV, Innis RB. Evaluation of anesthesia effects on [<sup>18</sup>F]fdg uptake in mouse brain and heart using small animal pet. *Nucl Med Biol.* 2004;31:251-256

## SUPPLEMENTAL FIGURE LEGENDS

**Supplemental Figure I.** Schematic of experimental design. Fluc<sup>+</sup>/eGFP<sup>+</sup> BMNCs were isolated and administered via direct intra-myocardial injection into wild-type (WT) FVB (syngeneic) mice who had undergone acute ischemia-reperfusion injury or sham surgery (no injury). Cell survival was assessed by longitudinal BLI carried out for several weeks. Hearts were explanted from a subset of animals in both groups, digested, and eGFP<sup>+</sup> BMNCs were isolated by FACS for whole-genome transcriptional profiling. This provided gene regulation profiles as a function of ischemic myocardial environment following transplant. To assess functional changes after BMNC transplant, I/R mice receiving BMNC were compared longitudinally against mice undergoing I/R injury with injection of PBS alone. This cohort underwent echocardiographic analysis, PET imaging, as well as pressure-volume loop and histological analysis.

**Supplemental Figure II.** Transplantation of BMNCs into non-ischemic hindlimb (A) A representative animal injected with  $3 \times 10^6$  BMNCs into the hindlimb of syngeneic FVB mice shows significant bioluminescence activity at day 7, which decreases progressively over the following 3 weeks. (B) Detailed quantitative analysis of signals from all animals transplanted with BMNCs. Signal activity is expressed as photons/s/cm<sup>2</sup>/sr.

**Supplemental Figure III.** Early BLI imaging predicts cardiac functional improvement. (A) Representative animals (n=6 per group) injected with  $2 \times 10^6$  BMNCs show significant variability of BLI signal intensity on day 2 after permanent LAD occlusion. (B) Detailed quantitative analysis of signals from all animals transplanted with BMNCs. Signal activity is expressed as photons/s/cm<sup>2</sup>/sr. (C) Day 2 BLI signal intensity (horizontal axis) correlates

robustly with BLI signal at day 35 (vertical axis). **(D)** Day 2 BLI signal intensity (horizontal axis) correlates well with cardiac function assessed by echocardiography at day 42 (vertical axis).

**Supplemental Figure IV.** Isolation of L2G85-derived, GFP<sup>+</sup> bone marrow mononuclear cells by Langendorff-digestion and FACS sorting after myocardial transplantation. **(A)** FACS analysis of a digested WT heart that received PBS 4 days prior to explantation compared with **(B)** WT heart that received  $5 \times 10^6$  L2G-derived bone marrow mononuclear cells reveals a distinct, GFP-expressing group of cells (red box). **(C)** Examination of the sorted cell population by fluorescent microscopy reveals GFP-expressing cells (scale bar=50 $\mu$ m) with a cytosolic pattern of GFP expression and autofluorescence of the multi-lobular nucleus of a typical mononuclear cell (blue-bordered inlay, scale bar=5 $\mu$ m).

## SUPPLEMENTAL TABLES

**Supplemental Table I.** Genes with upregulated expression in BMMCs transplanted into I/R-injured hearts vs. sham-operated hearts.

| Gene ID | Gene Name                                                                                                                                                          | fold change | q-value |
|---------|--------------------------------------------------------------------------------------------------------------------------------------------------------------------|-------------|---------|
| 4370    | RE1-silencing transcription factor                                                                                                                                 | 18.447      | 0.0190  |
| 507     | Myeloperoxidase                                                                                                                                                    | 18.427      | 0.0190  |
| 15302   | Low density lipoprotein receptor-related protein 1                                                                                                                 | 16.621      | 0.0337  |
| 2167    | CDC14 cell division cycle 14 homolog A ( <i>S. cerevisiae</i> )                                                                                                    | 11.396      | 0.0299  |
| 6386    | RIKEN cDNA 2700023B17 gene                                                                                                                                         | 11.142      | 0.0190  |
| 21261   | RIKEN cDNA 1300012C15 gene                                                                                                                                         | 10.153      | 0.0237  |
| 7699    | ESTs BG069076                                                                                                                                                      | 9.323       | 0.0190  |
| 16738   | ESTs BG075144                                                                                                                                                      | 8.386       | 0.0365  |
| 16804   | RIKEN cDNA 1810009A16 gene                                                                                                                                         | 7.642       | 0.0297  |
| 7296    | O-linked N-acetylglucosamine (GlcNAc) transferase (UDP-N-acetylglucosamine:polypeptide-N-acetylglucosaminyl transferase)                                           | 7.277       | 0.0190  |
| 7522    | Eukaryotic translation initiation factor 2, subunit 3, structural gene Y-linked H3062E05-5 NIA Mouse 15K cDNA Clone Set Mus musculus cDNA clone H3062E05 5',       | 6.913       | 0.0264  |
| 14155   | MRNA sequence                                                                                                                                                      | 6.785       | 0.0434  |
| 22355   | Actinin, alpha 1                                                                                                                                                   | 6.345       | 0.0190  |
| 11400   | DNA segment, Chr 4, ERATO Doi 78, expressed                                                                                                                        | 6.264       | 0.0299  |
| 11307   | ESTs BM237222                                                                                                                                                      | 6.235       | 0.0337  |
| 16604   | ESTs BM208190                                                                                                                                                      | 5.892       | 0.0190  |
| 13515   | Cholinergic receptor, muscarinic 3, cardiac                                                                                                                        | 5.685       | 0.0297  |
| 7259    | BCL2-like 13 (apoptosis facilitator)                                                                                                                               | 5.592       | 0.0190  |
| 13118   | Methionine sulfoxide reductase A                                                                                                                                   | 5.535       | 0.0219  |
| 9211    | Sarcoglycan, delta (dystrophin-associated glycoprotein)                                                                                                            | 5.405       | 0.0365  |
| 5604    | ESTs BM115315                                                                                                                                                      | 5.240       | 0.0245  |
| 5772    | RIKEN cDNA C230081A13 gene                                                                                                                                         | 5.140       | 0.0337  |
| 3248    | C77241 Mouse 3.5-dpc blastocyst cDNA Mus musculus cDNA clone J0027H07 3' similar to Mus musculus Mhc class II A beta polypeptide, partial cds, mRNA, MRNA sequence | 5.080       | 0.0299  |
| 9661    | SET and MYND domain containing 2                                                                                                                                   | 4.900       | 0.0337  |
| 17276   | Hypothetical protein 4931417A20                                                                                                                                    | 4.887       | 0.0245  |
| 18390   | Cysteine conjugate-beta lyase 1                                                                                                                                    | 4.753       | 0.0245  |
| 11285   | 5'-nucleotidase, cytosolic II                                                                                                                                      | 4.614       | 0.0365  |
| 7689    | Polymerase (DNA directed), eta (RAD 30 related)                                                                                                                    | 4.590       | 0.0190  |
| 10441   | Estrogen receptor 1 (alpha)                                                                                                                                        | 4.585       | 0.0190  |
| 5680    | Peroxisome proliferator activated receptor binding protein                                                                                                         | 4.543       | 0.0000  |
| 1309    | prolactin-like protein A                                                                                                                                           | 4.516       | 0.0299  |
| 16987   | ESTs BG068989                                                                                                                                                      | 4.485       | 0.0245  |
| 21804   | Transient receptor potential cation channel, subfamily M, member 3                                                                                                 | 4.480       | 0.0434  |
| 6204    | AT rich interactive domain 5B (Mrf1 like)                                                                                                                          | 4.452       | 0.0237  |
| 26      | leukocyte receptor cluster (LRC) member 8                                                                                                                          | 4.426       | 0.0190  |
| 3535    | CXORF15                                                                                                                                                            | 4.418       | 0.0000  |
| 21557   | Mitogen-activated protein kinase kinase kinase kinase 3                                                                                                            | 4.404       | 0.0299  |
| 8574    | ESTs AW542165                                                                                                                                                      | 4.370       | 0.0434  |
| 3282    | RAR-related orphan receptor alpha H3039A12-3 NIA Mouse 15K cDNA Clone Set Mus musculus cDNA clone H3039A12 3',                                                     | 4.345       | 0.0190  |
| 17635   | MRNA sequence                                                                                                                                                      | 4.314       | 0.0434  |
| 11968   | ESTs AW556287                                                                                                                                                      | 4.260       | 0.0458  |
| 7245    | C0201C10-3 NIA Mouse 7.5-dpc Whole Embryo cDNA Library (Long) Mus musculus                                                                                         | 4.254       | 0.0299  |

|       |                                                                                                                                                |       |        |
|-------|------------------------------------------------------------------------------------------------------------------------------------------------|-------|--------|
|       | cDNA clone NIA:C0201C10 IMAGE:30010689 3', mRNA sequence                                                                                       |       |        |
| 208   | RNA binding motif protein, X chromosome                                                                                                        | 4.239 | 0.0299 |
| 21002 | Mus musculus transcribed sequence with moderate similarity to protein pir:S12207 (M.musculus) S12207 hypothetical protein (B2 element) - mouse | 4.234 | 0.0402 |
| 608   | LIM and SH3 protein 1                                                                                                                          | 4.215 | 0.0297 |
| 21782 | Paired box gene 2                                                                                                                              | 4.206 | 0.0434 |
| 7087  | CDK5 regulatory subunit associated protein 2                                                                                                   | 4.192 | 0.0190 |
| 13127 | Ryanodine receptor 2, cardiac                                                                                                                  | 4.188 | 0.0337 |
| 13733 | Ribonuclease P 25 subunit (human)                                                                                                              | 4.139 | 0.0299 |
| 6424  | Nuclear receptor coactivator 1                                                                                                                 | 4.104 | 0.0190 |
| 5958  | ESTs C86523                                                                                                                                    | 4.090 | 0.0299 |
| 7674  | RIKEN cDNA 6230416A05 gene                                                                                                                     | 4.054 | 0.0190 |
| 7060  | RIKEN cDNA 2610304G08 gene                                                                                                                     | 4.051 | 0.0219 |
| 6659  | Zinc finger, CSL domain containing 2                                                                                                           | 4.007 | 0.0190 |
| 11601 | RIKEN cDNA F830020C16 gene transcribed sequence with weak similarity to protein ref:NP_081764.1 (M.musculus)                                   | 4.003 | 0.0297 |
| 3032  | RIKEN cDNA 5730493B19 [Mus musculus]                                                                                                           | 3.985 | 0.0299 |
| 16347 | ESTs BM114250                                                                                                                                  | 3.963 | 0.0365 |
| 16769 | Neurotrimin Mus musculus transcribed sequence with weak similarity to protein ref:NP_081764.1                                                  | 3.961 | 0.0297 |
| 11562 | (M.musculus) RIKEN cDNA 5730493B19 [Mus musculus]                                                                                              | 3.915 | 0.0299 |
| 5336  | Phosphatidylinositol-3-phosphatase associated protein                                                                                          | 3.912 | 0.0237 |
| 4349  | T-box 19                                                                                                                                       | 3.905 | 0.0434 |
| 9023  | ESTs BM205822                                                                                                                                  | 3.880 | 0.0245 |
| 640   | Splicing factor, arginine/serine-rich 2, interacting protein                                                                                   | 3.861 | 0.0297 |
| 169   | Zinc finger protein 106                                                                                                                        | 3.859 | 0.0245 |
| 18213 | Chemokine (C-C motif) receptor 2                                                                                                               | 3.846 | 0.0190 |
| 13741 | Ubiquitously transcribed tetratricopeptide repeat gene, Y chromosome L0502G02-3 NIA Mouse Newborn Heart cDNA Library Mus musculus cDNA clone   | 3.815 | 0.0458 |
| 18117 | L0502G02 3', mRNA sequence                                                                                                                     | 3.812 | 0.0299 |
| 8597  | Open reading frame 5                                                                                                                           | 3.806 | 0.0237 |
| 3445  | ESTs AU016686                                                                                                                                  | 3.786 | 0.0434 |
| 5096  | CDNA sequence BC027057                                                                                                                         | 3.716 | 0.0299 |
| 4558  | ESTs BM220566                                                                                                                                  | 3.709 | 0.0402 |
| 1971  | ESTs BM115946                                                                                                                                  | 3.707 | 0.0190 |
| 7032  | ESTs BG065784                                                                                                                                  | 3.707 | 0.0190 |
| 22083 | RIKEN cDNA E430034C17 gene                                                                                                                     | 3.701 | 0.0402 |
| 681   | hematopoietic SH2 protein                                                                                                                      | 3.700 | 0.0237 |
| 8355  | RIKEN cDNA 9130001E16 gene                                                                                                                     | 3.690 | 0.0245 |
| 7541  | Zinc finger, matrin-like COX10 homolog, cytochrome c oxidase assembly protein, heme A: farnesyltransferase                                     | 3.672 | 0.0365 |
| 22333 | (yeast)                                                                                                                                        | 3.667 | 0.0402 |
| 18351 | DNA2 DNA replication helicase 2-like (yeast)                                                                                                   | 3.663 | 0.0190 |
| 21440 | EST AU024779                                                                                                                                   | 3.639 | 0.0337 |
| 6831  | Suppression of tumorigenicity 7-like                                                                                                           | 3.627 | 0.0190 |
| 4564  | ESTs BM234559                                                                                                                                  | 3.618 | 0.0365 |
| 908   | vacuolar protein sorting 26 (yeast)                                                                                                            | 3.595 | 0.0190 |
| 2388  | ESTs BM120829                                                                                                                                  | 3.586 | 0.0190 |
| 9457  | PHD finger protein 17                                                                                                                          | 3.576 | 0.0245 |
| 17470 | Calsyntenin 2                                                                                                                                  | 3.572 | 0.0299 |
| 695   | ESTs BM219095                                                                                                                                  | 3.556 | 0.0190 |
| 6815  | DEAH (Asp-Glu-Ala-His) box polypeptide 35                                                                                                      | 3.546 | 0.0245 |
| 9006  | Exportin 6                                                                                                                                     | 3.510 | 0.0190 |
| 54    | Cleavage and polyadenylation specific factor 5                                                                                                 | 3.486 | 0.0245 |



|       |                                                                                                                                              |       |        |
|-------|----------------------------------------------------------------------------------------------------------------------------------------------|-------|--------|
| 3921  | Cathepsin B                                                                                                                                  | 3.475 | 0.0299 |
| 34    | Procollagen-lysine, 2-oxoglutarate 5-dioxygenase 1                                                                                           | 3.466 | 0.0337 |
| 16990 | Mus musculus transcribed sequence with weak similarity to protein ref:NP_081764.1 (M.musculus) RIKEN cDNA 5730493B19 [Mus musculus]          | 3.462 | 0.0337 |
| 8354  | ESTs BG066588                                                                                                                                | 3.439 | 0.0458 |
| 5126  | Phosphoserine/threonine/tyrosine interaction protein                                                                                         | 3.435 | 0.0297 |
| 9237  | Clathrin, heavy polypeptide (Hc)                                                                                                             | 3.433 | 0.0299 |
| 12753 | H3061G02-3 NIA Mouse 15K cDNA Clone Set Mus musculus cDNA clone H3061G02 3', MRNA sequence                                                   | 3.431 | 0.0402 |
| 7730  | ESTs BG070577                                                                                                                                | 3.421 | 0.0245 |
| 1530  | CDNA sequence BC065123                                                                                                                       | 3.414 | 0.0299 |
| 18356 | RIKEN cDNA A930015D03 gene                                                                                                                   | 3.398 | 0.0190 |
| 4033  | nuclear receptor coactivator 6 interacting protein                                                                                           | 3.381 | 0.0190 |
| 11394 | DiGeorge syndrome critical region gene 8                                                                                                     | 3.381 | 0.0190 |
| 12962 | SEC22 vesicle trafficking protein-like 1 (S. cerevisiae)                                                                                     | 3.376 | 0.0190 |
| 18    | Huntingtin interacting protein 1                                                                                                             | 3.354 | 0.0190 |
| 4328  | Splicing factor, arginine/serine-rich 15                                                                                                     | 3.345 | 0.0245 |
| 22000 | G protein-coupled receptor 172B                                                                                                              | 3.333 | 0.0190 |
| 8377  | UNKNOWN C0302G08                                                                                                                             | 3.325 | 0.0245 |
| 5416  | Copine III                                                                                                                                   | 3.323 | 0.0299 |
| 4327  | Proteasome (prosome, macropain) subunit, beta type 2                                                                                         | 3.285 | 0.0402 |
| 6348  | Radical fringe gene homolog (Drosophila)                                                                                                     | 3.278 | 0.0458 |
| 5000  | 16 days embryo head cDNA, RIKEN full-length enriched library, clone:C130006F20 product:unknown EST, full insert sequence                     | 3.261 | 0.0299 |
| 12739 | Seizure related 6 homolog (mouse)-like                                                                                                       | 3.259 | 0.0190 |
| 7158  | Matrix metalloproteinase 23                                                                                                                  | 3.245 | 0.0190 |
| 4129  | Cell division cycle 37 homolog (S. cerevisiae)                                                                                               | 3.241 | 0.0245 |
| 22411 | ESTs BG071060                                                                                                                                | 3.240 | 0.0434 |
| 12696 | RIKEN cDNA 2600014M03 gene                                                                                                                   | 3.225 | 0.0190 |
| 6176  | EST X83328                                                                                                                                   | 3.221 | 0.0337 |
| 4341  | ESTs BM219738                                                                                                                                | 3.215 | 0.0190 |
| 14545 | ESTs BG075148                                                                                                                                | 3.207 | 0.0245 |
| 13725 | CXXC finger 5                                                                                                                                | 3.205 | 0.0365 |
| 10192 | zinc finger RNA binding protein                                                                                                              | 3.184 | 0.0190 |
| 13426 | BTB (POZ) domain containing 6                                                                                                                | 3.179 | 0.0297 |
| 10951 | ubiquitination factor E4A, UFD2 homolog (S. cerevisiae)                                                                                      | 3.176 | 0.0434 |
| 7022  | ESTs BM120426                                                                                                                                | 3.174 | 0.0299 |
| 8118  | Laminin B1 subunit 1                                                                                                                         | 3.173 | 0.0190 |
| 7594  | purine rich element binding protein B                                                                                                        | 3.169 | 0.0434 |
| 5542  | Prolactin-like protein M                                                                                                                     | 3.163 | 0.0190 |
| 7144  | CDNA sequence BC022960                                                                                                                       | 3.159 | 0.0337 |
| 17001 | Mus musculus 12 days embryo eyeball cDNA, RIKEN full-length enriched library, clone:D230004D16 product:unclassifiable, full insert sequence. | 3.151 | 0.0299 |
| 9973  | ESTs BG068936                                                                                                                                | 3.146 | 0.0337 |
| 19809 | Diaphanous homolog 2 (Drosophila)                                                                                                            | 3.143 | 0.0434 |
| 10567 | Olfactory receptor 56                                                                                                                        | 3.129 | 0.0237 |
| 4682  | RIKEN cDNA 1110007A13 gene                                                                                                                   | 3.123 | 0.0237 |
| 2333  | Nuclear receptor coactivator 2                                                                                                               | 3.103 | 0.0190 |
| 16830 | L0003G04-3 NIA Mouse E12.5 Female Mesonephros and Gonads cDNA Library Mus musculus cDNA clone L0003G04 3', MRNA sequence                     | 3.096 | 0.0190 |
| 16530 | CD53 antigen                                                                                                                                 | 3.079 | 0.0264 |
| 5544  | ESTs BG068457                                                                                                                                | 3.061 | 0.0365 |
| 8796  | RIKEN cDNA 2210020M01 gene                                                                                                                   | 3.057 | 0.0337 |
| 7688  | ESTs BG064687                                                                                                                                | 3.057 | 0.0458 |

|       |                                                                                                                                                      |       |        |
|-------|------------------------------------------------------------------------------------------------------------------------------------------------------|-------|--------|
| 10408 | SEC24 related gene family, member A ( <i>S. cerevisiae</i> )                                                                                         | 3.051 | 0.0000 |
| 15714 | B-cell linker                                                                                                                                        | 3.051 | 0.0190 |
| 7478  | UNKNOWN L0812F11                                                                                                                                     | 3.037 | 0.0299 |
| 8579  | Nucleoporin 205                                                                                                                                      | 3.033 | 0.0190 |
| 3040  | Calcium channel, voltage-dependent, L type, alpha 1D subunit                                                                                         | 3.033 | 0.0237 |
| 5213  | ESTs BM217965                                                                                                                                        | 3.030 | 0.0299 |
| 2620  | Similar to General transcription factor 3C polypeptide 3 (Transcription factor IIIC-gamma subunit) (TF3C-gamma) (TFIIIC 102 kDa subunit) (TFIIIC102) | 3.029 | 0.0237 |
| 6522  | homer homolog 3 ( <i>Drosophila</i> )                                                                                                                | 3.019 | 0.0190 |
| 2400  | transcribed sequence with moderate similarity to protein prf:1614337A ( <i>M.musculus</i> )                                                          |       |        |
| 5585  | 1614337A formin [ <i>Mus musculus</i> ]                                                                                                              | 3.015 | 0.0190 |
| 10623 | ESTs BG075241                                                                                                                                        | 3.014 | 0.0299 |
| 4990  | Translocated promoter region                                                                                                                         | 3.003 | 0.0190 |
| 6702  | Transducin (beta)-like 1X-linked receptor 1                                                                                                          | 2.988 | 0.0299 |
| 7281  | Membrane-spanning 4-domains, subfamily A, member 6B                                                                                                  | 2.982 | 0.0297 |
| 5995  | Cleavage and polyadenylation specific factor 1                                                                                                       | 2.976 | 0.0337 |
| 1067  | Phosphorylase kinase alpha 2                                                                                                                         | 2.969 | 0.0365 |
| 19    | Glutamyl-prolyl-tRNA synthetase                                                                                                                      | 2.966 | 0.0458 |
| 21642 | RIKEN cDNA E130014J05 gene                                                                                                                           | 2.964 | 0.0190 |
| 3786  | ESTs BG067237                                                                                                                                        | 2.960 | 0.0299 |
| 5609  | Forkhead box J3                                                                                                                                      | 2.954 | 0.0337 |
| 15306 | L0283C06-3 NIA Mouse Newborn Ovary cDNA Library <i>Mus musculus</i> cDNA clone                                                                       |       |        |
| 17043 | L0283C06 3', MRNA sequence                                                                                                                           | 2.944 | 0.0237 |
| 21107 | RIKEN cDNA 1700022C02 gene                                                                                                                           | 2.937 | 0.0000 |
| 15036 | RIKEN cDNA 5330417K06 gene                                                                                                                           | 2.924 | 0.0264 |
| 7482  | PTPRF interacting protein, binding protein 1 (liprin beta 1)                                                                                         | 2.922 | 0.0299 |
| 6147  | F-box protein 39                                                                                                                                     | 2.921 | 0.0297 |
| 11690 | hypothetical protein B430319G23                                                                                                                      | 2.915 | 0.0245 |
| 8132  | Embryonic large molecule derived from yolk sac                                                                                                       | 2.894 | 0.0190 |
| 6627  | Pleckstrin and Sec7 domain containing 4                                                                                                              | 2.893 | 0.0245 |
| 473   | Tudor domain containing 3                                                                                                                            | 2.893 | 0.0365 |
| 4999  | Myeloid cell nuclear differentiation antigen                                                                                                         | 2.891 | 0.0458 |
| 1115  | Ras homolog gene family, member U                                                                                                                    | 2.883 | 0.0337 |
| 9574  | Vav 3 oncogene                                                                                                                                       | 2.879 | 0.0190 |
| 18148 | transcribed sequence with weak similarity to protein ref:NP_081764.1 ( <i>M.musculus</i> )                                                           |       |        |
| 8593  | RIKEN cDNA 5730493B19 [ <i>Mus musculus</i> ]                                                                                                        | 2.878 | 0.0190 |
| 9460  | Trinucleotide repeat containing 6a                                                                                                                   | 2.876 | 0.0190 |
| 11872 | ESTs BM236686                                                                                                                                        | 2.875 | 0.0297 |
| 3915  | Solute carrier family 7 (cationic amino acid transporter, y+ system), member 7                                                                       | 2.873 | 0.0245 |
| 7513  | Ubiquitin-like 1 (sentrin) activating enzyme E1A                                                                                                     | 2.871 | 0.0219 |
| 16101 | RIKEN cDNA 1300018J18 gene                                                                                                                           | 2.870 | 0.0190 |
| 11635 | solute carrier family 25 (mitochondrial carrier; ornithine transporter), member 15                                                                   | 2.853 | 0.0299 |
| 12372 | Sarcospan                                                                                                                                            | 2.843 | 0.0297 |
| 7459  | RIKEN cDNA 1110021E09 gene                                                                                                                           | 2.841 | 0.0237 |
| 12685 | ATP-binding cassette, sub-family C (CFTR/MRP), member 3                                                                                              | 2.839 | 0.0190 |
| 11842 | RIKEN cDNA 5730414C17 gene                                                                                                                           | 2.838 | 0.0402 |
| 6959  | Inositol polyphosphate multikinase                                                                                                                   | 2.831 | 0.0190 |
| 1974  | ESTs BG076236                                                                                                                                        | 2.830 | 0.0264 |
| 14785 | <i>Mus musculus</i> beta globin mRNA, partial cds                                                                                                    | 2.828 | 0.0299 |
| 19605 | Casein kinase II, alpha 1 polypeptide                                                                                                                | 2.825 | 0.0299 |
| 9236  | ESTs BG084297                                                                                                                                        | 2.810 | 0.0245 |
|       | tripartite motif protein 16                                                                                                                          | 2.808 | 0.0264 |
|       | RIKEN cDNA 2810028N01 gene                                                                                                                           | 2.806 | 0.0190 |
|       | Pleckstrin homology domain containing, family G (with RhoGef domain) member 4                                                                        | 2.804 | 0.0299 |

|       |                                                                                                                        |       |        |
|-------|------------------------------------------------------------------------------------------------------------------------|-------|--------|
| 5206  | ESTs AU041696                                                                                                          | 2.794 | 0.0190 |
| 8119  | Vav2 oncogene                                                                                                          | 2.790 | 0.0434 |
| 8598  | ESTs BQ558545                                                                                                          | 2.789 | 0.0337 |
| 15060 | R3H domain (binds single-stranded nucleic acids)                                                                       | 2.785 | 0.0190 |
| 4911  | NOL1/NOP2/Sun domain family 2<br>transcribed sequence with strong similarity to protein pir:S12207 (M.musculus) S12207 | 2.781 | 0.0299 |
| 4347  | hypothetical protein (B2 element) - mouse                                                                              | 2.774 | 0.0264 |
| 9233  | RIKEN cDNA 3110002H16 gene                                                                                             | 2.772 | 0.0237 |
| 909   | Estrogen receptor 2 (beta)                                                                                             | 2.771 | 0.0299 |
| 485   | F-box and leucine-rich repeat protein 12                                                                               | 2.768 | 0.0299 |
| 12336 | CDNA sequence BC002230                                                                                                 | 2.767 | 0.0299 |
| 602   | CWF19-like 2, cell cycle control (S. pombe)                                                                            | 2.765 | 0.0365 |
| 19802 | RIKEN cDNA 2210408F21 gene                                                                                             | 2.758 | 0.0299 |
| 7030  | Glyoxylate reductase/hydroxypyruvate reductase                                                                         | 2.758 | 0.0299 |
| 22094 | RIKEN cDNA D930043N17 gene                                                                                             | 2.756 | 0.0000 |
| 4910  | A kinase (PRKA) anchor protein (yotiao) 9                                                                              | 2.753 | 0.0299 |
| 5875  | ESTs C79677                                                                                                            | 2.752 | 0.0245 |
| 9234  | Zinc finger protein 94                                                                                                 | 2.749 | 0.0219 |
| 7464  | RIKEN cDNA 3110001I22 gene                                                                                             | 2.749 | 0.0458 |
| 7279  | ESTs BM293416                                                                                                          | 2.742 | 0.0402 |
| 7950  | Gremlin 2 homolog, cysteine knot superfamily (Xenopus laevis)                                                          | 2.737 | 0.0365 |
| 6875  | Peroxiredoxin 3                                                                                                        | 2.735 | 0.0365 |
| 607   | ESTs BG074084                                                                                                          | 2.734 | 0.0337 |
| 7691  | Ligand of numb-protein X 2                                                                                             | 2.721 | 0.0458 |
| 7607  | ESTs BM239048                                                                                                          | 2.719 | 0.0365 |
| 8644  | ESTs BM241069                                                                                                          | 2.711 | 0.0299 |
| 14462 | RIKEN cDNA 9030624J02 gene                                                                                             | 2.707 | 0.0190 |
| 18888 | RIKEN cDNA B230120H23 gene                                                                                             | 2.701 | 0.0264 |
| 7928  | RIKEN cDNA 4933429I20 gene                                                                                             | 2.700 | 0.0402 |
| 18589 | Fas (TNFRSF6)-associated via death domain                                                                              | 2.698 | 0.0190 |
| 11093 | RIKEN cDNA 2410002O22 gene                                                                                             | 2.695 | 0.0000 |
| 4957  | Expressed sequence C78409                                                                                              | 2.691 | 0.0245 |
| 5758  | Hyaluronan and proteoglycan link protein 1                                                                             | 2.689 | 0.0299 |
| 8789  | ESTs BG070566                                                                                                          | 2.684 | 0.0245 |
| 178   | DnaJ (Hsp40) homolog, subfamily C, member 7                                                                            | 2.682 | 0.0297 |
| 680   | Protein kinase C, eta                                                                                                  | 2.663 | 0.0190 |
| 5989  | ESTs BI076718                                                                                                          | 2.662 | 0.0434 |
| 4905  | Expressed sequence AI447904                                                                                            | 2.661 | 0.0337 |
| 12922 | Possibly intronic in U014579-H3037B07                                                                                  | 2.655 | 0.0245 |
| 16592 | EST AA407452                                                                                                           | 2.652 | 0.0245 |
| 4598  | Expressed sequence AI848218                                                                                            | 2.652 | 0.0237 |
| 9663  | Vacuolar protein sorting 16 (yeast)                                                                                    | 2.647 | 0.0264 |
| 1533  | Ubiquitin specific protease 31                                                                                         | 2.644 | 0.0190 |
| 3673  | Serine (or cysteine) proteinase inhibitor, clade B, member 9                                                           | 2.636 | 0.0237 |
| 17457 | Transmembrane channel-like gene family 3                                                                               | 2.636 | 0.0245 |
| 21947 | Glycerol phosphate dehydrogenase 2, mitochondrial                                                                      | 2.635 | 0.0000 |
| 12917 | Latent transforming growth factor beta binding protein 1                                                               | 2.635 | 0.0299 |
| 51    | PAK1 interacting protein 1                                                                                             | 2.632 | 0.0337 |
| 4242  | Ankyrin repeat domain 25                                                                                               | 2.629 | 0.0297 |
| 11361 | IQ motif containing GTPase activating protein 1                                                                        | 2.623 | 0.0190 |
| 2251  | Calmodulin binding protein 1                                                                                           | 2.620 | 0.0402 |
| 11912 | Ribosomal protein L28                                                                                                  | 2.615 | 0.0402 |
| 7664  | Aminoacylase 1                                                                                                         | 2.612 | 0.0337 |
| 12772 | A disintegrin-like and metalloprotease (repolysin type) with thrombospondin type 1 motif,                              | 2.609 | 0.0458 |

18

|       |                                                                                                                                                      |       |        |
|-------|------------------------------------------------------------------------------------------------------------------------------------------------------|-------|--------|
| 13406 | Transmembrane protein 16F                                                                                                                            | 2.608 | 0.0190 |
| 20424 | Ubiquitin specific protease 7                                                                                                                        | 2.604 | 0.0190 |
| 21048 | Hephaestin                                                                                                                                           | 2.602 | 0.0190 |
| 15950 | RIKEN cDNA C530014P21 gene                                                                                                                           | 2.600 | 0.0365 |
| 14223 | hypothetical protein 4933427D06                                                                                                                      | 2.599 | 0.0245 |
| 603   | Lactation elevated 1                                                                                                                                 | 2.599 | 0.0402 |
| 20951 | Chondroitin sulfate GalNAcT-2                                                                                                                        | 2.598 | 0.0337 |
| 12164 | Vesicle transport through interaction with t-SNAREs homolog 1A (yeast)                                                                               | 2.595 | 0.0245 |
| 15635 | Trans-acting transcription factor 1                                                                                                                  | 2.595 | 0.0337 |
| 18489 | RIKEN cDNA E430028B21 gene                                                                                                                           | 2.594 | 0.0190 |
| 6990  | ADP-ribosylation factor GTPase activating protein 1                                                                                                  | 2.579 | 0.0458 |
| 5580  | Tensin                                                                                                                                               | 2.578 | 0.0297 |
| 3478  | Solute carrier family 30 (zinc transporter), member 4                                                                                                | 2.578 | 0.0190 |
| 9245  | L-threonine dehydrogenase                                                                                                                            | 2.574 | 0.0434 |
| 21797 | Annexin A4                                                                                                                                           | 2.573 | 0.0245 |
| 16501 | Guanylate nucleotide binding protein 2                                                                                                               | 2.572 | 0.0245 |
| 7287  | Zinc metalloproteinase, STE24 homolog ( <i>S. cerevisiae</i> )                                                                                       | 2.569 | 0.0337 |
| 6635  | Teratocarcinoma expressed, serine rich                                                                                                               | 2.567 | 0.0245 |
| 5061  | DNA segment, Chr 2, ERATO Doi 435, expressed                                                                                                         | 2.562 | 0.0190 |
| 4742  | Oxoglutarate dehydrogenase (lipoamide)                                                                                                               | 2.559 | 0.0299 |
| 11540 | Ubiquitin specific protease 3                                                                                                                        | 2.557 | 0.0245 |
| 696   | Secretory carrier membrane protein 1                                                                                                                 | 2.557 | 0.0299 |
| 380   | Flap structure specific endonuclease 1                                                                                                               | 2.555 | 0.0365 |
| 13258 | RIKEN cDNA 5033428A16 gene                                                                                                                           | 2.552 | 0.0245 |
| 389   | Cytoplasmic polyadenylation element binding protein 4                                                                                                | 2.551 | 0.0264 |
| 7277  | hypothetical protein D430050E18                                                                                                                      | 2.549 | 0.0337 |
| 6453  | Hypothetical protein 9530064J02                                                                                                                      | 2.546 | 0.0190 |
| 10075 | Candidate tumor suppressor OVCA2                                                                                                                     | 2.542 | 0.0190 |
| 3706  | RIKEN cDNA 1810012N01 gene                                                                                                                           | 2.540 | 0.0337 |
| 8365  | Mus musculus adult male pituitary gland cDNA, RIKEN full-length enriched library, clone:5330428H05 product:unknown EST, full insert sequence         | 2.540 | 0.0402 |
| 18967 | RIKEN cDNA 4932417H02 gene                                                                                                                           | 2.539 | 0.0245 |
| 7836  | RIKEN cDNA 1110032A03 gene                                                                                                                           | 2.538 | 0.0219 |
| 21108 | Laminin, alpha 2                                                                                                                                     | 2.537 | 0.0297 |
| 13125 | XPA binding protein 1                                                                                                                                | 2.535 | 0.0237 |
| 1127  | RIKEN cDNA 6720464I07 gene                                                                                                                           | 2.535 | 0.0264 |
| 20254 | RIKEN cDNA 3010021M21 gene                                                                                                                           | 2.535 | 0.0458 |
| 9890  | Eukaryotic translation initiation factor 5                                                                                                           | 2.535 | 0.0299 |
| 9447  | Polymerase (RNA) III (DNA directed) polypeptide F                                                                                                    | 2.534 | 0.0190 |
| 16371 | RIKEN cDNA 4930579K19 gene                                                                                                                           | 2.534 | 0.0245 |
| 11753 | Complement receptor related protein                                                                                                                  | 2.531 | 0.0245 |
| 4562  | RIKEN cDNA 2610042O14 gene                                                                                                                           | 2.523 | 0.0365 |
| 19799 | Mus musculus 12 days embryo eyeball cDNA, RIKEN full-length enriched library, clone:D230039L18 product:unknown EST, full insert sequence.            | 2.518 | 0.0219 |
| 12255 | Mediator of RNA polymerase II transcription, subunit 19 homolog (yeast)<br>AU024754 Mouse unfertilized egg cDNA Mus musculus cDNA clone J0460A12 3', | 2.516 | 0.0190 |
| 20432 | MRNA sequence                                                                                                                                        | 2.516 | 0.0264 |
| 15013 | Chloride channel calcium activated 1                                                                                                                 | 2.515 | 0.0458 |
| 17725 | MAP kinase-interacting serine/threonine kinase 1                                                                                                     | 2.513 | 0.0297 |
| 7052  | RIKEN cDNA 5830415L20 gene                                                                                                                           | 2.507 | 0.0264 |
| 2149  | G protein-coupled receptor kinase 5                                                                                                                  | 2.505 | 0.0299 |
| 11910 | CDC-like kinase 2                                                                                                                                    | 2.502 | 0.0190 |
| 17346 | 5'-nucleotidase, cytosolic II                                                                                                                        | 2.501 | 0.0190 |

|       |                                                                                                                                                                                    |       |        |
|-------|------------------------------------------------------------------------------------------------------------------------------------------------------------------------------------|-------|--------|
| 469   | Inner centromere protein                                                                                                                                                           | 2.500 | 0.0337 |
| 14512 | Eyes absent 3 homolog (Drosophila)                                                                                                                                                 | 2.490 | 0.0190 |
| 12632 | SAC1 (supressor of actin mutations 1, homolog)-like (S. cerevisiae)                                                                                                                | 2.489 | 0.0190 |
| 5156  | GTL2, imprinted maternally expressed untranslated mRNA                                                                                                                             | 2.482 | 0.0402 |
| 22048 | Ets variant gene 4 (E1A enhancer binding protein, E1AF)                                                                                                                            | 2.481 | 0.0245 |
| 20521 | CDNA sequence BC037674                                                                                                                                                             | 2.477 | 0.0264 |
| 12131 | clathrin, heavy polypeptide (Hc)                                                                                                                                                   | 2.474 | 0.0190 |
| 21927 | Speckle-type POZ protein                                                                                                                                                           | 2.471 | 0.0190 |
| 694   | casein kinase 1, alpha 1                                                                                                                                                           | 2.471 | 0.0365 |
| 22433 | RIKEN cDNA 4632412E09 gene                                                                                                                                                         | 2.471 | 0.0190 |
| 6631  | Hypothetical protein E030010A14                                                                                                                                                    | 2.467 | 0.0434 |
| 21955 | CDNA sequence BC039282                                                                                                                                                             | 2.466 | 0.0190 |
| 4550  | Mus musculus 12 days embryo embryonic body between diaphragm region and neck cDNA, RIKEN full-length enriched library, clone:9430010H01 product:unknown EST, full insert sequence. | 2.464 | 0.0245 |
| 7267  | Proteasome (prosome, macropain) subunit, alpha type, 8                                                                                                                             | 2.464 | 0.0402 |
| 21517 | UDP-glucose pyrophosphorylase 2                                                                                                                                                    | 2.457 | 0.0458 |
| 5344  | DNA segment, Chr 10, Wayne State University 102, expressed                                                                                                                         | 2.452 | 0.0365 |
| 4136  | Hydroxysteroid dehydrogenase-4, delta<5>-3-beta                                                                                                                                    | 2.441 | 0.0365 |
| 15958 | RIKEN cDNA 4930563C04 gene                                                                                                                                                         | 2.441 | 0.0245 |
| 6661  | ESTs BM195572                                                                                                                                                                      | 2.439 | 0.0337 |
| 19319 | Pre-B-cell leukemia transcription factor interacting protein 1                                                                                                                     | 2.439 | 0.0402 |
| 8389  | Niemann Pick type C2                                                                                                                                                               | 2.439 | 0.0190 |
| 16603 | RIKEN cDNA 1110004P21 gene                                                                                                                                                         | 2.437 | 0.0190 |
| 8577  | Transforming, acidic coiled-coil containing protein 1                                                                                                                              | 2.435 | 0.0297 |
| 8055  | CCR4-NOT transcription complex, subunit 6                                                                                                                                          | 2.433 | 0.0190 |
| 4243  | ESTs C78651                                                                                                                                                                        | 2.431 | 0.0365 |
| 596   | ubiquitin specific protease 8                                                                                                                                                      | 2.423 | 0.0337 |
| 3424  | Baculoviral IAP repeat-containing 1b                                                                                                                                               | 2.421 | 0.0190 |
| 30    | ATP-binding cassette, sub-family G (WHITE), member 2                                                                                                                               | 2.420 | 0.0190 |
| 8003  | Solute carrier organic anion transporter family, member 4a1                                                                                                                        | 2.419 | 0.0365 |
| 7518  | BAI1-associated protein 1                                                                                                                                                          | 2.417 | 0.0299 |
| 2187  | RIKEN cDNA 6030404K05 gene                                                                                                                                                         | 2.415 | 0.0337 |
| 12963 | Meiotic recombination 11 homolog A (S. cerevisiae)                                                                                                                                 | 2.412 | 0.0190 |
| 5072  | Protein kinase C binding protein 1                                                                                                                                                 | 2.410 | 0.0245 |
| 14975 | CDK5 regulatory subunit associated protein 1-like 1                                                                                                                                | 2.402 | 0.0190 |
| 4174  | CAMP-regulated phosphoprotein 19                                                                                                                                                   | 2.400 | 0.0402 |
| 7897  | DNA segment, Chr 11, ERATO Doi 518, expressed                                                                                                                                      | 2.398 | 0.0458 |
| 13993 | Retinoic acid induced 17                                                                                                                                                           | 2.396 | 0.0190 |
| 13100 | Transcription factor 19                                                                                                                                                            | 2.396 | 0.0245 |
| 2613  | RIKEN cDNA 3230401M21 gene                                                                                                                                                         | 2.395 | 0.0245 |
| 7488  | Adaptor-related protein complex 3, beta 2 subunit                                                                                                                                  | 2.393 | 0.0337 |
| 17889 | ESTs AW556563                                                                                                                                                                      | 2.393 | 0.0299 |
| 8092  | Mus musculus transcribed sequence with weak similarity to protein ref:NP_081764.1 (M.musculus) RIKEN cDNA 5730493B19 [Mus musculus]                                                | 2.392 | 0.0434 |
| 19606 | Laminin, gamma 1                                                                                                                                                                   | 2.388 | 0.0337 |
| 3984  | Syntaxin binding protein 1                                                                                                                                                         | 2.387 | 0.0402 |
| 3812  | Ribosomal protein L5                                                                                                                                                               | 2.383 | 0.0190 |
| 9566  | CCR4-NOT transcription complex, subunit 6-like                                                                                                                                     | 2.383 | 0.0190 |
| 15819 | GTPase, IMAP family member 4                                                                                                                                                       | 2.380 | 0.0299 |
| 5160  | Expressed sequence AI225782                                                                                                                                                        | 2.374 | 0.0299 |
| 20514 | Zinc finger protein 295                                                                                                                                                            | 2.371 | 0.0190 |
| 8806  | Similar to prostaglandin D receptor                                                                                                                                                | 2.370 | 0.0402 |
| 17551 | RIKEN cDNA 5330440M15 gene                                                                                                                                                         | 2.367 | 0.0245 |

|       |                                                                                                |       |        |
|-------|------------------------------------------------------------------------------------------------|-------|--------|
| 6868  | RIKEN cDNA 6720464I07 gene                                                                     | 2.365 | 0.0458 |
| 14813 | Interferon alpha responsive gene                                                               | 2.360 | 0.0190 |
| 8804  | Follicle stimulating hormone receptor                                                          | 2.359 | 0.0365 |
|       | transcribed sequence with weak similarity to protein ref:NP_081764.1 (M.musculus)              |       |        |
| 52    | RIKEN cDNA 5730493B19 [Mus musculus]                                                           | 2.358 | 0.0434 |
| 8567  | RIKEN cDNA 2010106G01 gene                                                                     | 2.357 | 0.0245 |
| 2186  | CDNA sequence BC024814                                                                         | 2.357 | 0.0337 |
| 7421  | RIKEN cDNA 1500032D16 gene                                                                     | 2.355 | 0.0299 |
| 9016  | RIKEN cDNA E430023H19 gene                                                                     | 2.353 | 0.0299 |
| 13321 | RIKEN cDNA D230046B21 gene                                                                     | 2.351 | 0.0365 |
| 9577  | RIKEN cDNA 5830415L20 gene                                                                     | 2.347 | 0.0000 |
| 1758  | RIKEN cDNA A230055J12 gene                                                                     | 2.346 | 0.0434 |
| 14030 | Optic atrophy 1 homolog (human)                                                                | 2.345 | 0.0190 |
| 246   | Disrupted in renal carcinoma 2 (human)                                                         | 2.344 | 0.0434 |
| 6420  | RIKEN cDNA 6430706D22 gene                                                                     | 2.343 | 0.0402 |
| 5258  | RIKEN cDNA 2900060P06 gene                                                                     | 2.341 | 0.0458 |
|       | Swi/SNF related matrix associated, actin dependent regulator of chromatin, subfamily a-like 1  |       |        |
| 6845  | like 1                                                                                         | 2.337 | 0.0297 |
| 17654 | TBC1 domain family, member 2                                                                   | 2.336 | 0.0237 |
| 19129 | Transducin (beta)-like 1X-linked receptor 1                                                    | 2.334 | 0.0245 |
| 20061 | RIKEN cDNA E030004N02 gene                                                                     | 2.330 | 0.0299 |
| 4615  | RIKEN cDNA 4633402D15 gene                                                                     | 2.324 | 0.0237 |
| 7276  | Mitogen activated protein kinase kinase 1                                                      | 2.323 | 0.0365 |
| 475   | COP9 (constitutive photomorphogenic) homolog, subunit 3 (Arabidopsis thaliana)                 | 2.322 | 0.0337 |
| 5345  | Leucine zipper transcription factor-like 1                                                     | 2.322 | 0.0365 |
| 15189 | Cell division cycle 40 homolog (yeast)                                                         | 2.320 | 0.0219 |
| 15448 | BCS1-like (yeast)                                                                              | 2.320 | 0.0264 |
| 18543 | Dystrophin, muscular dystrophy                                                                 | 2.319 | 0.0299 |
| 690   | SUMO/sentrin specific protease 3                                                               | 2.316 | 0.0402 |
| 18592 | Bystin-like                                                                                    | 2.316 | 0.0190 |
| 3697  | RIKEN cDNA 1110012D08 gene                                                                     | 2.315 | 0.0237 |
| 13587 | Tripartite motif protein 37                                                                    | 2.312 | 0.0190 |
| 6841  | DEAD (Asp-Glu-Ala-Asp) box polypeptide 27                                                      | 2.311 | 0.0365 |
| 5119  | Guanine nucleotide binding protein-like 3 (nucleolar)                                          | 2.310 | 0.0402 |
| 15245 | Synaptojanin 2                                                                                 | 2.309 | 0.0190 |
| 10658 | Pleiomorphic adenoma gene-like 2                                                               | 2.308 | 0.0434 |
| 5844  | Mitogen-activated protein kinase kinase kinase 14                                              | 2.306 | 0.0190 |
| 10076 | RIKEN cDNA 1200013B08 gene                                                                     | 2.306 | 0.0299 |
| 6238  | Expressed sequence AI462438                                                                    | 2.304 | 0.0190 |
| 7591  | Transient receptor potential cation channel, subfamily M, member 7                             | 2.302 | 0.0297 |
| 5584  | RIKEN cDNA 4930503E14 gene                                                                     | 2.301 | 0.0299 |
| 21980 | Napsin A aspartic peptidase                                                                    | 2.301 | 0.0402 |
| 1667  | Expressed sequence C80008                                                                      | 2.296 | 0.0402 |
| 1116  | Tumor necrosis factor (ligand) superfamily, member 8                                           | 2.296 | 0.0365 |
| 8829  | RIKEN cDNA 5430439M09 gene                                                                     | 2.294 | 0.0190 |
| 7037  | RIKEN cDNA 2610507L03 gene                                                                     | 2.293 | 0.0365 |
| 8159  | ESTs BG068633                                                                                  | 2.292 | 0.0458 |
| 8588  | Oral cancer overexpressed 1                                                                    | 2.292 | 0.0337 |
| 17938 | similar to zinc finger protein 97                                                              | 2.291 | 0.0219 |
| 18032 | RIKEN cDNA 2610304F09 gene                                                                     | 2.288 | 0.0190 |
| 15341 | Oxysterol binding protein-like 2                                                               | 2.287 | 0.0219 |
|       | Mus musculus transcribed sequence with weak similarity to protein ref:NP_081764.1 (M.musculus) |       |        |
| 6741  | (M.musculus) RIKEN cDNA 5730493B19 [Mus musculus]                                              | 2.285 | 0.0434 |
| 2504  | Ribosomal protein L8                                                                           | 2.283 | 0.0219 |

|       |                                                                                                                                                                                   |       |        |
|-------|-----------------------------------------------------------------------------------------------------------------------------------------------------------------------------------|-------|--------|
| 19310 | Synapse associated protein 1                                                                                                                                                      | 2.282 | 0.0190 |
| 17641 | Fms interacting protein                                                                                                                                                           | 2.281 | 0.0190 |
| 15269 | RIKEN cDNA 2210404D11 gene                                                                                                                                                        | 2.279 | 0.0365 |
| 2188  | Sperm associated antigen 5                                                                                                                                                        | 2.277 | 0.0299 |
| 12112 | Splicing factor, arginine/serine rich 9                                                                                                                                           | 2.270 | 0.0190 |
| 13181 | Solute carrier family 25 (mitochondrial carrier, dicarboxylate transporter), member 10                                                                                            | 2.269 | 0.0299 |
| 15972 | Homer homolog 1 (Drosophila)                                                                                                                                                      | 2.269 | 0.0190 |
| 7033  | ESTs BG069333                                                                                                                                                                     | 2.269 | 0.0365 |
| 3937  | Rho GTPase activating protein 18                                                                                                                                                  | 2.267 | 0.0190 |
| 1752  | Transcription factor-like 1                                                                                                                                                       | 2.266 | 0.0365 |
| 4537  | UNKNOWN H3111B03                                                                                                                                                                  | 2.266 | 0.0402 |
| 18321 | ESTs AW554592                                                                                                                                                                     | 2.266 | 0.0365 |
| 2809  | RIKEN cDNA 1300018J18 gene                                                                                                                                                        | 2.263 | 0.0245 |
| 6031  | Thymoma viral proto-oncogene 3                                                                                                                                                    | 2.255 | 0.0237 |
| 7297  | Neuroblastoma ras oncogene                                                                                                                                                        | 2.253 | 0.0264 |
| 7156  | NADH dehydrogenase (ubiquinone) 1 alpha subcomplex 10                                                                                                                             | 2.251 | 0.0245 |
| 18632 | Nucleolar protein family 6 (RNA-associated)                                                                                                                                       | 2.242 | 0.0245 |
| 12122 | Forkhead box O1                                                                                                                                                                   | 2.242 | 0.0299 |
| 9544  | Coenzyme Q6 homolog (yeast)                                                                                                                                                       | 2.241 | 0.0299 |
| 4639  | RIKEN cDNA 2810450G17 gene                                                                                                                                                        | 2.241 | 0.0434 |
| 1553  | Fanconi anemia, complementation group D2                                                                                                                                          | 2.241 | 0.0458 |
| 21180 | Kinesin family member 4                                                                                                                                                           | 2.241 | 0.0190 |
| 18222 | Interleukin 18 binding protein                                                                                                                                                    | 2.241 | 0.0245 |
| 11862 | RIKEN cDNA 0610037L13 gene                                                                                                                                                        | 2.241 | 0.0219 |
| 6953  | adenomatosis polyposis coli                                                                                                                                                       | 2.240 | 0.0402 |
| 553   | Interleukin-1 receptor-associated kinase 1                                                                                                                                        | 2.239 | 0.0458 |
| 16749 | Cellular repressor of E1A-stimulated genes 1                                                                                                                                      | 2.238 | 0.0219 |
| 7049  | Carboxylesterase 2                                                                                                                                                                | 2.237 | 0.0245 |
| 1549  | Lysophospholipase 3                                                                                                                                                               | 2.237 | 0.0402 |
| 16129 | Solute carrier family 22 (organic cation transporter), member 5                                                                                                                   | 2.232 | 0.0190 |
| 9949  | aldehyde dehydrogenase 9, subfamily A1                                                                                                                                            | 2.232 | 0.0190 |
| 3916  | Mus musculus 7 days embryo whole body cDNA, RIKEN full-length enriched library, clone:C430015A10 product:hypothetical Lysine-rich region containing protein, full insert sequence | 2.231 | 0.0365 |
| 2593  | TBC1 domain family, member 19                                                                                                                                                     | 2.231 | 0.0299 |
| 7159  | sema domain, immunoglobulin domain (Ig), short basic domain, secreted, (semaphorin) 3E                                                                                            | 2.230 | 0.0237 |
| 20976 | G1 to S phase transition 1                                                                                                                                                        | 2.227 | 0.0237 |
| 21081 | RIKEN cDNA 9130227C08 gene                                                                                                                                                        | 2.225 | 0.0297 |
| 12965 | RIKEN cDNA 2700008N14 gene                                                                                                                                                        | 2.224 | 0.0365 |
| 13314 | RIKEN cDNA 4833409A17 gene                                                                                                                                                        | 2.224 | 0.0402 |
| 8692  | Suppressor of cytokine signaling 2                                                                                                                                                | 2.224 | 0.0365 |
| 21336 | CDNA sequence BC030335                                                                                                                                                            | 2.224 | 0.0190 |
| 5396  | Engulfment and cell motility 3, ced-12 homolog (C. elegans)                                                                                                                       | 2.221 | 0.0245 |
| 13103 | Mediator of RNA polymerase II transcription, subunit 25 homolog (yeast)                                                                                                           | 2.221 | 0.0190 |
| 18766 | RIKEN cDNA 1810055E12 gene                                                                                                                                                        | 2.219 | 0.0219 |
| 4049  | Mus musculus transcribed sequence with weak similarity to protein ref:NP_081764.1 (M.musculus) RIKEN cDNA 5730493B19 [Mus musculus]                                               | 2.219 | 0.0434 |
| 11618 | RIKEN cDNA 4933431N12 gene                                                                                                                                                        | 2.217 | 0.0337 |
| 20998 | transcribed sequence with strong similarity to protein pir:S12207 (M.musculus) S12207 hypothetical protein (B2 element) - mouse                                                   | 2.213 | 0.0365 |
| 21362 | Glycerol-3-phosphate dehydrogenase 1-like                                                                                                                                         | 2.212 | 0.0190 |
| 4130  | RIKEN cDNA 2900046H12 gene                                                                                                                                                        | 2.211 | 0.0434 |
| 20805 | Similar to Sorting nexin 23                                                                                                                                                       | 2.208 | 0.0237 |

|       |                                                                                          |       |        |
|-------|------------------------------------------------------------------------------------------|-------|--------|
| 2608  | Ubiquitin specific protease 31                                                           | 2.208 | 0.0190 |
| 7577  | Calreticulin                                                                             | 2.207 | 0.0297 |
| 14055 | translocase of outer mitochondrial membrane 20 homolog (yeast)                           | 2.206 | 0.0297 |
| 10437 | Solute carrier family 35, member B4                                                      | 2.206 | 0.0190 |
| 21500 | Palmitoyl-protein thioesterase 1                                                         | 2.204 | 0.0245 |
| 9694  | Purine rich element binding protein B                                                    | 2.198 | 0.0297 |
| 1764  | Heat shock protein 8                                                                     | 2.193 | 0.0237 |
|       | Mus musculus transcribed sequence with weak similarity to protein ref:NP_081764.1        |       |        |
| 12966 | (M.musculus) RIKEN cDNA 5730493B19 [Mus musculus]                                        | 2.190 | 0.0434 |
| 20469 | Growth factor, erv1 ( <i>S. cerevisiae</i> )-like (augmenter of liver regeneration)      | 2.189 | 0.0190 |
| 17953 | RIKEN cDNA 4930507D05 gene                                                               | 2.189 | 0.0402 |
| 4228  | Chemokine (C-C motif) ligand 9                                                           | 2.188 | 0.0297 |
| 5764  | RIKEN cDNA 1190002N15 gene                                                               | 2.188 | 0.0402 |
| 17861 | Prolyl endopeptidase                                                                     | 2.187 | 0.0190 |
| 20658 | Splicing factor, arginine/serine-rich 2, interacting protein                             | 2.185 | 0.0190 |
| 20822 | RIKEN cDNA 9530020G05 gene                                                               | 2.184 | 0.0299 |
| 8686  | SH3 multiple domains 2                                                                   | 2.183 | 0.0434 |
| 8848  | Ribosomal protein L15                                                                    | 2.183 | 0.0190 |
| 20310 | ATP-binding cassette, sub-family D (ALD), member 4                                       | 2.181 | 0.0219 |
| 1112  | copper chaperone for superoxide dismutase                                                | 2.180 | 0.0219 |
| 236   | ESTs BG074720                                                                            | 2.179 | 0.0434 |
| 2813  | stearoyl-Coenzyme A desaturase 1                                                         | 2.177 | 0.0190 |
| 21555 | Membrane bound C2 domain containing protein                                              | 2.177 | 0.0237 |
| 13140 | Pyridoxal (pyridoxine, vitamin B6) kinase                                                | 2.174 | 0.0337 |
| 6101  | Dipeptidylpeptidase 8                                                                    | 2.174 | 0.0190 |
| 13886 | ESTs BG075117                                                                            | 2.173 | 0.0365 |
| 16574 | Germ cell-specific gene 2                                                                | 2.168 | 0.0299 |
| 13949 | Malic enzyme 2, NAD(+)-dependent, mitochondrial                                          | 2.168 | 0.0190 |
| 13537 | RIKEN cDNA 5730409G15 gene                                                               | 2.168 | 0.0190 |
| 17849 | RIKEN cDNA 9130230N09 gene                                                               | 2.166 | 0.0365 |
|       | transcribed sequence with weak similarity to protein sp:P11369 (M.musculus)              |       |        |
|       | POL2_MOUSE Retrovirus-related POL polyprotein [Contains: Reverse transcriptase ;         |       |        |
| 17293 | Endonuclease]                                                                            | 2.166 | 0.0190 |
| 19075 | RIKEN cDNA B830009D23 gene                                                               | 2.165 | 0.0299 |
| 10391 | Cytochrome P450, family 11, subfamily a, polypeptide 1                                   | 2.165 | 0.0458 |
| 9266  | Forkhead box P2                                                                          | 2.165 | 0.0402 |
| 17645 | ESTs BQ556237                                                                            | 2.164 | 0.0299 |
| 10699 | Procollagen, type IV, alpha 3 (Goodpasture antigen) binding protein                      | 2.163 | 0.0264 |
| 10959 | Linker of T-cell receptor pathways                                                       | 2.163 | 0.0299 |
| 20804 | RIKEN cDNA 1200020A08 gene                                                               | 2.163 | 0.0190 |
| 5802  | expressed sequence AI838577                                                              | 2.161 | 0.0434 |
|       | SWI/SNF related, matrix associated, actin dependent regulator of chromatin, subfamily a, |       |        |
| 15715 | member 4                                                                                 | 2.161 | 0.0245 |
| 22170 | N-ethylmaleimide sensitive fusion protein attachment protein alpha                       | 2.160 | 0.0299 |
| 8784  | WAP four-disulfide core domain 1                                                         | 2.160 | 0.0402 |
| 6252  | Testis expressed gene 12                                                                 | 2.159 | 0.0365 |
| 15882 | Vesicle-associated membrane protein 2                                                    | 2.158 | 0.0402 |
| 8817  | Signaling intermediate in Toll pathway-evolutionarily conserved                          | 2.157 | 0.0434 |
| 4858  | Rho/rac guanine nucleotide exchange factor (GEF) 18                                      | 2.156 | 0.0237 |
|       | Mus musculus, Similar to cytochrome c oxidase III, mitochondrial, clone                  |       |        |
| 13700 | IMAGE:4500967, mRNA                                                                      | 2.155 | 0.0297 |
| 3732  | Zinc finger, DHHC domain containing 16                                                   | 2.155 | 0.0299 |
| 16978 | Glycosyltransferase-like domain containing 1                                             | 2.155 | 0.0434 |
| 6944  | lectin, galactose binding, soluble 8                                                     | 2.155 | 0.0190 |



|       |                                                                                |       |        |
|-------|--------------------------------------------------------------------------------|-------|--------|
| 14706 | Replication protein A1                                                         | 2.154 | 0.0190 |
| 12892 | Transmembrane emp24 protein transport domain containing 5                      | 2.154 | 0.0190 |
| 6838  | ESTs AU022566                                                                  | 2.151 | 0.0402 |
| 19039 | ESTs AW552788                                                                  | 2.151 | 0.0190 |
| 5120  | Protocadherin gamma subfamily C, 3                                             | 2.151 | 0.0402 |
| 4512  | Similar to bromodomain containing protein 1; BR140-like gene                   | 2.148 | 0.0434 |
| 17082 | RIKEN cDNA 4930522P08 gene                                                     | 2.146 | 0.0190 |
| 2185  | Ubiquitin specific protease 22                                                 | 2.146 | 0.0365 |
| 1159  | RIKEN cDNA 1810055G02 gene                                                     | 2.143 | 0.0245 |
| 18976 | RIKEN cDNA 1810063B05 gene                                                     | 2.143 | 0.0245 |
| 15524 | ESTs BM206654                                                                  | 2.141 | 0.0402 |
| 22389 | Histone deacetylase 6                                                          | 2.137 | 0.0237 |
| 22338 | RIKEN cDNA 2810428C21 gene                                                     | 2.136 | 0.0245 |
| 4806  | N-ethylmaleimide sensitive fusion protein attachment protein gamma             | 2.136 | 0.0434 |
| 10071 | Valyl-tRNA synthetase 2                                                        | 2.136 | 0.0365 |
| 2689  | Solute carrier family 14 (urea transporter), member 1                          | 2.134 | 0.0297 |
| 19648 | Glutamate-cysteine ligase, catalytic subunit                                   | 2.134 | 0.0299 |
| 18760 | RIKEN cDNA 1110015K06 gene                                                     | 2.132 | 0.0337 |
|       | L0241D06-3 NIA Mouse Newborn Ovary cDNA Library Mus musculus cDNA clone        |       |        |
| 16575 | L0241D06 3', mRNA sequence                                                     | 2.132 | 0.0299 |
| 16626 | Leucine-rich and death domain containing                                       | 2.132 | 0.0237 |
| 18267 | RIKEN cDNA 1700064K09 gene                                                     | 2.131 | 0.0219 |
| 12964 | ESTs BM218837                                                                  | 2.131 | 0.0190 |
| 20632 | Muscleblind-like 1 (Drosophila)                                                | 2.130 | 0.0245 |
| 1476  | Cytoplasmic polyadenylation element binding protein 2                          | 2.129 | 0.0245 |
| 7066  | RIKEN cDNA A930038C07 gene                                                     | 2.129 | 0.0434 |
| 19502 | Cell division cycle 2-like 5 (cholinesterase-related cell division controller) | 2.127 | 0.0245 |
| 21916 | Serine/arginine-rich protein specific kinase 2                                 | 2.127 | 0.0245 |
| 11233 | Signal sequence receptor, alpha                                                | 2.126 | 0.0190 |
| 1324  | PWP2 (periodic tryptophan protein) homolog, yeast                              | 2.126 | 0.0245 |
| 6390  | Deleted in polyposis 1                                                         | 2.126 | 0.0402 |
| 4331  | Integral inner nuclear membrane protein MAN1                                   | 2.122 | 0.0190 |
| 7742  | Splicing factor 3b, subunit 3                                                  | 2.119 | 0.0190 |
| 21986 | RIKEN cDNA 6430548M08 gene                                                     | 2.119 | 0.0190 |
| 17253 | Adaptor-related protein complex 3, beta 1 subunit                              | 2.116 | 0.0337 |
| 9792  | TAF3 RNA polymerase II, TATA box binding protein (TBP)-associated factor       | 2.115 | 0.0365 |
| 12321 | ceroid-lipofuscinosis, neuronal 5                                              | 2.115 | 0.0190 |
| 18344 | Retinoblastoma 1                                                               | 2.114 | 0.0402 |
| 17026 | RIKEN cDNA 2700094F01 gene                                                     | 2.113 | 0.0190 |
| 13185 | Ring finger and WD repeat domain 3                                             | 2.113 | 0.0299 |
| 13907 | RIKEN cDNA 3830406C13 gene                                                     | 2.112 | 0.0190 |
| 9071  | Sperm associated antigen 5                                                     | 2.110 | 0.0365 |
| 11901 | RIKEN cDNA C330017115 gene                                                     | 2.108 | 0.0219 |
| 18296 | Prominin 1                                                                     | 2.107 | 0.0245 |
| 17005 | THAP domain containing 4                                                       | 2.107 | 0.0245 |
| 21810 | Adaptor-related protein complex AP-4, mu 1                                     | 2.106 | 0.0190 |
| 1524  | RNA polymerase 1-4                                                             | 2.106 | 0.0299 |
| 4970  | RIKEN cDNA 6230412P20 gene                                                     | 2.104 | 0.0264 |
| 3875  | Eukaryotic translation initiation factor 3, subunit 5 (epsilon)                | 2.102 | 0.0434 |
| 8658  | UDP-GlcNAc:betaGal beta-1,3-N-acetylglucosaminyltransferase 6                  | 2.099 | 0.0245 |
| 7143  | Nuclear receptor co-repressor 2                                                | 2.098 | 0.0245 |
| 15767 | Opioid growth factor receptor                                                  | 2.095 | 0.0299 |
| 11636 | ATPase, Class V, type 10D                                                      | 2.093 | 0.0190 |
| 10139 | Leucine-zipper-like transcriptional regulator, 1                               | 2.093 | 0.0190 |

|       |                                                                                                                                                                       |       |        |
|-------|-----------------------------------------------------------------------------------------------------------------------------------------------------------------------|-------|--------|
|       | Mus musculus, Similar to cytochrome c oxidase III, mitochondrial, clone                                                                                               |       |        |
| 8026  | IMAGE:4500967, mRNA                                                                                                                                                   | 2.092 | 0.0299 |
| 14901 | RIKEN cDNA D730044K07 gene                                                                                                                                            | 2.092 | 0.0264 |
|       | L0271F09-3 NIA Mouse Newborn Ovary cDNA Library Mus musculus cDNA clone                                                                                               |       |        |
| 7345  | L0271F09 3', MRNA sequence                                                                                                                                            | 2.092 | 0.0245 |
| 5629  | Lectin, mannose-binding 2                                                                                                                                             | 2.091 | 0.0297 |
| 20202 | expressed sequence AW124694                                                                                                                                           | 2.091 | 0.0237 |
| 10044 | Mitogen activated protein kinase kinase 2                                                                                                                             | 2.090 | 0.0365 |
| 7932  | RIKEN cDNA 2410118I19 gene                                                                                                                                            | 2.090 | 0.0299 |
| 17703 | RIKEN cDNA 3010001F23 gene                                                                                                                                            | 2.089 | 0.0299 |
| 10482 | Actin related protein 2/3 complex, subunit 4                                                                                                                          | 2.089 | 0.0190 |
| 4760  | Fatty acid desaturase 3                                                                                                                                               | 2.088 | 0.0190 |
| 19006 | Hypothetical A830091E24                                                                                                                                               | 2.088 | 0.0297 |
| 6337  | Alpha thalassemia/mental retardation syndrome X-linked homolog (human)<br>transcribed sequence with weak similarity to protein pir:S23650 (H.sapiens) S23650          | 2.088 | 0.0365 |
| 9224  | retrovirus-related hypothetical protein II - human retrotransposon LINE-1                                                                                             | 2.087 | 0.0434 |
| 19851 | Adenomatosis polyposis coli                                                                                                                                           | 2.087 | 0.0297 |
| 21525 | Glycerol-3-phosphate dehydrogenase 1-like                                                                                                                             | 2.086 | 0.0264 |
| 18459 | RIKEN cDNA 5730589K01 gene                                                                                                                                            | 2.085 | 0.0402 |
| 16408 | Insulin-like growth factor binding protein 3                                                                                                                          | 2.084 | 0.0365 |
| 7238  | Testis derived transcript 3                                                                                                                                           | 2.083 | 0.0337 |
| 12027 | Regulator of G-protein signaling 3                                                                                                                                    | 2.080 | 0.0299 |
| 13593 | Transmembrane protein 19                                                                                                                                              | 2.078 | 0.0190 |
| 1180  | RIKEN cDNA 0610037H22 gene                                                                                                                                            | 2.078 | 0.0297 |
| 8902  | Beta-2 microglobulin                                                                                                                                                  | 2.077 | 0.0237 |
| 10455 | Tumor necrosis factor, alpha-induced protein 1 (endothelial)                                                                                                          | 2.075 | 0.0299 |
| 13432 | RIKEN cDNA D430028G21 gene                                                                                                                                            | 2.075 | 0.0299 |
| 14143 | DNA methyltransferase 3B                                                                                                                                              | 2.074 | 0.0190 |
| 5063  | Optic atrophy 1 homolog (human)                                                                                                                                       | 2.074 | 0.0434 |
| 21566 | Tripartite motif protein 13                                                                                                                                           | 2.073 | 0.0264 |
| 22496 | Branched chain ketoacid dehydrogenase kinase                                                                                                                          | 2.073 | 0.0402 |
| 55    | Integrin binding sialoprotein                                                                                                                                         | 2.072 | 0.0458 |
| 7953  | Aldo-keto reductase family 1, member A4 (aldehyde reductase)                                                                                                          | 2.072 | 0.0458 |
| 18842 | ESTs C77673                                                                                                                                                           | 2.071 | 0.0237 |
| 18352 | UDP-Gal:betaGlcNAc beta 1,3-galactosyltransferase, polypeptide 5                                                                                                      | 2.069 | 0.0365 |
| 8447  | DNA segment, Chr 16, ERATO Doi 472, expressed                                                                                                                         | 2.066 | 0.0219 |
| 11170 | Ngfi-A binding protein 2                                                                                                                                              | 2.066 | 0.0190 |
| 17875 | Thioesterase, adipose associated                                                                                                                                      | 2.065 | 0.0245 |
| 6675  | erythrocyte protein band 4.1                                                                                                                                          | 2.065 | 0.0365 |
| 20081 | Cyclin-dependent kinase 6                                                                                                                                             | 2.065 | 0.0245 |
| 15054 | Syndecan 3                                                                                                                                                            | 2.063 | 0.0337 |
| 6987  | Multiple substrate lipid kinase                                                                                                                                       | 2.062 | 0.0299 |
| 13431 | Expressed sequence C79407                                                                                                                                             | 2.062 | 0.0219 |
| 18062 | DNA segment, Chr 5, Wayne State University 152, expressed                                                                                                             | 2.062 | 0.0190 |
| 10754 | NMDA receptor-regulated gene 2                                                                                                                                        | 2.057 | 0.0245 |
|       | transcribed sequence with moderate similarity to protein pir:C21124 (D.melanogaster)<br>C21124 Bkm-like sex-determining region hypothetical protein CS319 - fruit fly |       |        |
| 1074  | (Drosophila melanogaster) (fragment)                                                                                                                                  | 2.056 | 0.0299 |
| 2184  | Glutamyl-prolyl-tRNA synthetase                                                                                                                                       | 2.056 | 0.0365 |
| 16837 | Sorbitol dehydrogenase 1                                                                                                                                              | 2.055 | 0.0190 |
| 8141  | Sorcin                                                                                                                                                                | 2.054 | 0.0365 |
| 17538 | BTB (POZ) domain containing 3                                                                                                                                         | 2.054 | 0.0337 |
| 2147  | DNA segment, Human S2298E                                                                                                                                             | 2.051 | 0.0245 |
| 11142 | RIKEN cDNA A630082K20 gene                                                                                                                                            | 2.051 | 0.0365 |

|       |                                                                                                                                              |       |        |
|-------|----------------------------------------------------------------------------------------------------------------------------------------------|-------|--------|
| 11874 | RIKEN cDNA D230014I24 gene                                                                                                                   | 2.050 | 0.0245 |
| 10636 | osmotic stress protein                                                                                                                       | 2.047 | 0.0190 |
| 7502  | RIKEN cDNA 2810453L12 gene                                                                                                                   | 2.046 | 0.0219 |
| 8647  | Expressed sequence AA415817                                                                                                                  | 2.046 | 0.0190 |
| 16241 | RIKEN cDNA 4930403J22 gene                                                                                                                   | 2.045 | 0.0365 |
| 17772 | Tissue specific transplantation antigen P35B                                                                                                 | 2.045 | 0.0264 |
| 5141  | Suppressor of cytokine signaling 6                                                                                                           | 2.043 | 0.0458 |
| 18229 | Polymerase (RNA) III (DNA directed) polypeptide E                                                                                            | 2.042 | 0.0299 |
| 1120  | ESTs BM218892                                                                                                                                | 2.042 | 0.0402 |
| 19047 | Ribosomal protein L7-like 1                                                                                                                  | 2.041 | 0.0219 |
| 21685 | ADP-ribosyltransferase 3                                                                                                                     | 2.040 | 0.0299 |
| 14059 | Eukaryotic translation initiation factor 2, subunit 2 (beta)                                                                                 | 2.039 | 0.0434 |
| 3045  | Ankyrin repeat and KH domain containing 1                                                                                                    | 2.039 | 0.0219 |
| 16507 | Intersectin 1 (SH3 domain protein 1A)                                                                                                        | 2.037 | 0.0299 |
| 21930 | CDC2-related kinase 7                                                                                                                        | 2.034 | 0.0297 |
| 11940 | Troponin I, cardiac                                                                                                                          | 2.033 | 0.0337 |
| 10687 | Cystatin C                                                                                                                                   | 2.029 | 0.0299 |
| 10140 | RIKEN cDNA A430107J06 gene                                                                                                                   | 2.029 | 0.0219 |
| 11367 | RIKEN cDNA 1810019A08 gene                                                                                                                   | 2.028 | 0.0402 |
| 18371 | RIKEN cDNA 4921521J11 gene                                                                                                                   | 2.027 | 0.0299 |
| 8199  | EST BM231793                                                                                                                                 | 2.027 | 0.0299 |
| 17492 | Eukaryotic translation initiation factor 2 alpha kinase 1                                                                                    | 2.026 | 0.0297 |
| 4303  | RIKEN cDNA 1110028E10 gene                                                                                                                   | 2.026 | 0.0402 |
| 13104 | RIKEN cDNA D230012E17 gene                                                                                                                   | 2.025 | 0.0264 |
| 15921 | RIKEN cDNA 2610312E17 gene                                                                                                                   | 2.024 | 0.0190 |
| 10079 | Proteasome (prosome, macropain) 26S subunit, non-ATPase, 1                                                                                   | 2.024 | 0.0365 |
| 19505 | Chromodomain helicase DNA binding protein 9                                                                                                  | 2.024 | 0.0190 |
| 18629 | Kruppel-like factor 7 (ubiquitous)                                                                                                           | 2.023 | 0.0299 |
| 19456 | RIKEN cDNA 5730509C05 gene                                                                                                                   | 2.022 | 0.0402 |
| 16658 | Ceroid-lipofuscinosis, neuronal 2                                                                                                            | 2.022 | 0.0237 |
| 15912 | Ubiquitin-like, containing PHD and RING finger domains 2                                                                                     | 2.015 | 0.0245 |
| 664   | Tumor necrosis factor superfamily, member 5-induced protein 1                                                                                | 2.012 | 0.0337 |
| 16950 | CDC42 small effector 2                                                                                                                       | 2.011 | 0.0264 |
| 18135 | RIKEN cDNA 4832441B07 gene                                                                                                                   | 2.006 | 0.0297 |
| 13277 | Transforming growth factor beta regulated gene 1                                                                                             | 2.004 | 0.0245 |
| 8699  | Mus musculus transcribed sequence with strong similarity to protein pir:S12207 (M.musculus) S12207 hypothetical protein (B2 element) - mouse | 2.003 | 0.0365 |
| 15560 | Cell division cycle 6 homolog (S. cerevisiae)                                                                                                | 2.002 | 0.0190 |
| 20960 | RIKEN cDNA 1300007B12 gene                                                                                                                   | 1.998 | 0.0190 |
| 15842 | Diphtheria toxin resistance protein required for diphthamide biosynthesis (Saccharomyces)-like 2                                             | 1.998 | 0.0190 |
| 18603 | Signal sequence receptor, alpha                                                                                                              | 1.997 | 0.0237 |
| 16607 | TBC1 domain family, member 22a                                                                                                               | 1.997 | 0.0297 |
| 8186  | Zinc finger protein 654                                                                                                                      | 1.996 | 0.0245 |
| 19396 | RIKEN cDNA 6530401C20 gene                                                                                                                   | 1.993 | 0.0299 |
| 9007  | Mannose-6-phosphate receptor binding protein 1                                                                                               | 1.993 | 0.0299 |
| 8253  | Expressed sequence AW549877                                                                                                                  | 1.992 | 0.0190 |
| 11434 | Zinc finger and BTB domain containing 34                                                                                                     | 1.990 | 0.0337 |
| 13650 | RIKEN cDNA A230065C20 gene                                                                                                                   | 1.988 | 0.0190 |
| 9778  | H2-K region expressed gene 6                                                                                                                 | 1.986 | 0.0402 |
| 1323  | RIKEN cDNA A630078A22 gene                                                                                                                   | 1.982 | 0.0190 |
| 16668 | Eukaryotic translation initiation factor 2B, subunit 5 epsilon                                                                               | 1.981 | 0.0190 |
| 15582 | RIKEN cDNA 0610007P08 gene                                                                                                                   | 1.980 | 0.0264 |
| 16578 | Immature colon carcinoma transcript 1                                                                                                        | 1.980 | 0.0297 |

|       |                                                                                                                                                              |       |        |
|-------|--------------------------------------------------------------------------------------------------------------------------------------------------------------|-------|--------|
| 8426  | Synovial apoptosis inhibitor 1, synoviolin                                                                                                                   | 1.980 | 0.0245 |
| 16584 | Trinucleotide repeat containing 15                                                                                                                           | 1.973 | 0.0245 |
| 22336 | OMA1 homolog, zinc metallopeptidase ( <i>S. cerevisiae</i> )                                                                                                 | 1.973 | 0.0190 |
| 13560 | Ribonuclease P/MRP 38 subunit (human)                                                                                                                        | 1.971 | 0.0402 |
| 10381 | CDC28 protein kinase 1b                                                                                                                                      | 1.970 | 0.0245 |
| 20607 | RAB24, member RAS oncogene family                                                                                                                            | 1.970 | 0.0190 |
| 4733  | similar to phosphatidylinositol glycan class S (LOC276846), mRNA                                                                                             | 1.970 | 0.0365 |
| 3861  | TRIF-related adapter molecule TRAM                                                                                                                           | 1.969 | 0.0402 |
| 14659 | ELK3, member of ETS oncogene family                                                                                                                          | 1.969 | 0.0365 |
| 10962 | Transducin (beta)-like 1 X-linked                                                                                                                            | 1.966 | 0.0297 |
| 18071 | CDNA sequence BC054822                                                                                                                                       | 1.964 | 0.0297 |
| 8716  | Braf transforming gene                                                                                                                                       | 1.963 | 0.0264 |
| 5046  | SUMO/sentrin specific protease 5                                                                                                                             | 1.963 | 0.0264 |
| 19267 | RIKEN cDNA 5031439A09 gene                                                                                                                                   | 1.962 | 0.0190 |
| 1099  | RIKEN cDNA 2900060B22 gene                                                                                                                                   | 1.961 | 0.0299 |
| 3110  | Sorting nexin 17                                                                                                                                             | 1.961 | 0.0237 |
| 19183 | Calcineurin binding protein 1                                                                                                                                | 1.957 | 0.0245 |
| 911   | Protein kinase, AMP-activated, gamma 1 non-catalytic subunit                                                                                                 | 1.957 | 0.0458 |
| 21985 | DNA segment, Chr X, Immunex 40, expressed                                                                                                                    | 1.957 | 0.0337 |
| 261   | ATPase, class V, type 10A                                                                                                                                    | 1.957 | 0.0365 |
| 7831  | Tissue inhibitor of metalloproteinase 2                                                                                                                      | 1.957 | 0.0337 |
| 12446 | Tryptophan rich basic protein                                                                                                                                | 1.956 | 0.0299 |
| 3628  | ribosomal protein L6                                                                                                                                         | 1.956 | 0.0365 |
| 10398 | RIKEN cDNA 2010321M09 gene                                                                                                                                   | 1.954 | 0.0237 |
| 8790  | CDNA sequence BC020002                                                                                                                                       | 1.953 | 0.0245 |
| 3463  | Adult male aorta and vein cDNA, RIKEN full-length enriched library, clone:A530047H08 product:unknown EST, full insert sequence                               | 1.953 | 0.0245 |
| 17969 | spermatid perinuclear RNA binding protein transcribed sequence with strong similarity to protein pir:S12207 ( <i>M.musculus</i> ) S12207                     | 1.953 | 0.0299 |
| 13376 | hypothetical protein (B2 element) - mouse                                                                                                                    | 1.952 | 0.0365 |
| 6690  | RIKEN cDNA 1110003F05 gene                                                                                                                                   | 1.951 | 0.0299 |
| 22257 | SET domain-containing protein 7                                                                                                                              | 1.951 | 0.0219 |
| 3696  | Elastin microfibril interfacier 1                                                                                                                            | 1.951 | 0.0365 |
| 1026  | RIKEN cDNA 1700022L09 gene                                                                                                                                   | 1.947 | 0.0245 |
| 11266 | Serine/arginine repetitive matrix 1                                                                                                                          | 1.947 | 0.0337 |
| 11934 | Ribosomal protein L7                                                                                                                                         | 1.946 | 0.0337 |
| 13223 | Ribosomal protein L6                                                                                                                                         | 1.945 | 0.0365 |
| 8895  | C0620G11-3 NIA Mouse Trophoblast Stem Cell cDNA Library (Long) <i>Mus musculus</i> cDNA clone C0620G11 3', MRNA sequence                                     | 1.943 | 0.0434 |
| 19099 | ferritin heavy chain                                                                                                                                         | 1.940 | 0.0365 |
| 18757 | ATPase, Na <sup>+</sup> /K <sup>+</sup> transporting, alpha 3 polypeptide                                                                                    | 1.934 | 0.0297 |
| 12084 | Tubulin tyrosine ligase-like family, member 4                                                                                                                | 1.927 | 0.0264 |
| 11861 | RIO kinase 1 (yeast)                                                                                                                                         | 1.927 | 0.0219 |
| 5569  | Coenzyme Q4 homolog (yeast)                                                                                                                                  | 1.927 | 0.0245 |
| 7111  | RIKEN cDNA C730036B14 gene                                                                                                                                   | 1.925 | 0.0299 |
| 18338 | <i>Mus musculus</i> transcribed sequence with weak similarity to protein ref:NP_081764.1 ( <i>M.musculus</i> ) RIKEN cDNA 5730493B19 [ <i>Mus musculus</i> ] | 1.924 | 0.0458 |
| 10419 | RIKEN cDNA 3321401G04 gene                                                                                                                                   | 1.924 | 0.0245 |
| 17258 | Bicaudal C homolog 1 ( <i>Drosophila</i> )                                                                                                                   | 1.921 | 0.0190 |
| 11619 | Cullin 4B                                                                                                                                                    | 1.921 | 0.0337 |
| 20353 | Expressed sequence AW547186                                                                                                                                  | 1.921 | 0.0434 |
| 13607 | RIKEN cDNA D330001F17 gene                                                                                                                                   | 1.920 | 0.0190 |
| 8749  | SCY1-like 3 ( <i>S. cerevisiae</i> )                                                                                                                         | 1.918 | 0.0237 |
| 8974  | DNA segment, Chr 14, Abbott 1 expressed                                                                                                                      | 1.917 | 0.0365 |

|       |                                                                                               |       |        |
|-------|-----------------------------------------------------------------------------------------------|-------|--------|
| 11234 | Signal recognition particle 14                                                                | 1.916 | 0.0245 |
| 22207 | Transcribed locus, strongly similar to NP_056099.1 KIAA0467 protein [Homo sapiens]            | 1.916 | 0.0299 |
| 13199 | Signal transducing adaptor molecule (SH3 domain and ITAM motif) 2                             | 1.915 | 0.0299 |
| 15743 | RIKEN cDNA 2810439F02 gene                                                                    | 1.914 | 0.0245 |
| 22446 | Expressed sequence AI462438                                                                   | 1.912 | 0.0337 |
| 13132 | Androgen-induced proliferation inhibitor                                                      | 1.911 | 0.0190 |
| 239   | Triosephosphate isomerase 1                                                                   | 1.911 | 0.0297 |
| 404   | Expressed sequence AI838661                                                                   | 1.910 | 0.0190 |
| 11120 | Guanine nucleotide binding protein, beta 2, related sequence 1                                | 1.910 | 0.0245 |
| 12701 | Polymerase (RNA) II (DNA directed) polypeptide I                                              | 1.909 | 0.0434 |
| 20492 | RIKEN cDNA 4933403F05 gene                                                                    | 1.909 | 0.0297 |
| 13186 | Prefoldin 4                                                                                   | 1.908 | 0.0365 |
| 8920  | Polymerase (DNA directed), epsilon                                                            | 1.907 | 0.0219 |
| 12384 | Ubiquitin specific protease 39                                                                | 1.906 | 0.0245 |
| 21104 | Dynein, cytoplasmic, light intermediate chain 1                                               | 1.906 | 0.0237 |
| 16634 | B-cell receptor-associated protein 31                                                         | 1.902 | 0.0190 |
| 13268 | CHK2 checkpoint homolog (S. pombe)                                                            | 1.901 | 0.0245 |
| 16518 | Methylmalonic aciduria (cobalamin deficiency) type A                                          | 1.900 | 0.0297 |
| 18385 | Eukaryotic translation initiation factor 1A, Y-linked                                         | 1.900 | 0.0190 |
| 6246  | Rho guanine nucleotide exchange factor (GEF) 3                                                | 1.899 | 0.0458 |
| 21654 | ATP-binding cassette, sub-family A (ABC1), member 1                                           | 1.899 | 0.0245 |
| 19027 | UNKNOWN L0804D05                                                                              | 1.899 | 0.0402 |
| 10440 | Expressed sequence C78859                                                                     | 1.897 | 0.0365 |
| 16883 | Vitamin D receptor interacting protein                                                        | 1.896 | 0.0434 |
| 6203  | Acetyl-Coenzyme A acetyltransferase 3                                                         | 1.894 | 0.0245 |
| 7864  | Dodecenoyl-Coenzyme A delta isomerase (3,2 trans-enoyl-Coenzyme A isomerase)                  | 1.894 | 0.0299 |
| 3469  | Translocase of inner mitochondrial membrane 10 homolog (yeast)                                | 1.893 | 0.0299 |
| 18094 | Transmembrane protein 34                                                                      | 1.892 | 0.0245 |
| 7942  | CCCTC-binding factor                                                                          | 1.891 | 0.0434 |
| 19436 | U5 small nuclear ribonucleoprotein                                                            | 1.891 | 0.0299 |
| 8308  | RIKEN cDNA 2310067E08 gene                                                                    | 1.891 | 0.0297 |
| 18728 | Radixin                                                                                       | 1.890 | 0.0245 |
| 12266 | PREDICTED: Mus musculus similar to RIKEN cDNA 6030426L16 (LOC382713), mRNA                    | 1.890 | 0.0434 |
| 19367 | ESTs AU021877                                                                                 | 1.889 | 0.0365 |
| 8615  | Sema domain, transmembrane domain (TM), and cytoplasmic domain, (semaphorin) 6B               | 1.887 | 0.0299 |
| 13623 | Phosphoribosyl pyrophosphate synthetase-associated protein 1                                  | 1.884 | 0.0402 |
| 9648  | Nucleoporin 43                                                                                | 1.882 | 0.0337 |
| 19867 | Solute carrier family 7 (cationic amino acid transporter, y+ system), member 6                | 1.881 | 0.0299 |
| 7769  | H3093B08-3 NIA Mouse 15K cDNA Clone Set Mus musculus cDNA clone H3093B08 3',<br>MRNA sequence | 1.881 | 0.0458 |
| 21667 | DNA Segment, Chr 15 Massachusetts Institute of Technology 260                                 | 1.880 | 0.0337 |
| 9196  | RIKEN cDNA E130016I23 gene                                                                    | 1.880 | 0.0245 |
| 2831  | RIKEN cDNA 5330439J01 gene                                                                    | 1.878 | 0.0299 |
| 18357 | N-deacetylase/N-sulfotransferase (heparan glucosaminyl) 1                                     | 1.878 | 0.0264 |
| 8760  | RIKEN cDNA 1500041J02 gene                                                                    | 1.876 | 0.0245 |
| 18358 | ESTs BM219239                                                                                 | 1.875 | 0.0434 |
| 17985 | F-box only protein 3                                                                          | 1.875 | 0.0299 |
| 11876 | RIKEN cDNA 4833418A01 gene                                                                    | 1.873 | 0.0458 |
| 5463  | DEAD (Asp-Glu-Ala-Asp) box polypeptide 58                                                     | 1.868 | 0.0337 |
| 14027 | RIKEN cDNA 2810407C02 gene                                                                    | 1.867 | 0.0434 |
| 22318 | Adaptor protein complex AP-2, mu1                                                             | 1.867 | 0.0264 |
| 3525  | Bromodomain containing 8                                                                      | 1.864 | 0.0458 |
| 8344  | expressed sequence AA409541                                                                   | 1.864 | 0.0365 |
| 20350 | Solute carrier family 39 (zinc transporter), member 14                                        | 1.864 | 0.0402 |

|       |                                                                                                                     |       |        |
|-------|---------------------------------------------------------------------------------------------------------------------|-------|--------|
| 15160 | RIKEN cDNA C130061O14 gene                                                                                          | 1.863 | 0.0299 |
| 15146 | Fanconi anemia, complementation group D2                                                                            | 1.862 | 0.0299 |
| 11586 | Zinc finger protein 281                                                                                             | 1.861 | 0.0190 |
| 14044 | Protocadherin 12                                                                                                    | 1.860 | 0.0365 |
| 17341 | CAMP-regulated phosphoprotein 19                                                                                    | 1.860 | 0.0190 |
| 12909 | RIKEN cDNA 0610041E09 gene                                                                                          | 1.858 | 0.0219 |
| 18104 | Ubiquitin-conjugating enzyme E2N                                                                                    | 1.856 | 0.0337 |
| 17674 | RIKEN cDNA 9430020M11 gene                                                                                          | 1.856 | 0.0237 |
| 9310  | Mitogen-activated protein kinase 6                                                                                  | 1.855 | 0.0299 |
| 11663 | Integrin alpha 3                                                                                                    | 1.855 | 0.0458 |
| 4797  | DNA segment, Chr 10, University of California at Los Angeles 1                                                      | 1.855 | 0.0402 |
| 7837  | RIKEN cDNA 6330415G19 gene                                                                                          | 1.854 | 0.0219 |
| 9257  | nuclear receptor coactivator 6 interacting protein                                                                  | 1.854 | 0.0337 |
| 859   | Ribosomal protein L38                                                                                               | 1.850 | 0.0402 |
| 11654 | Sorbitol dehydrogenase 1                                                                                            | 1.848 | 0.0237 |
| 1327  | PDZ domain containing 11                                                                                            | 1.847 | 0.0402 |
| 21713 | Proline synthetase co-transcribed                                                                                   | 1.846 | 0.0297 |
| 8526  | Transcription factor B2, mitochondrial                                                                              | 1.846 | 0.0297 |
| 18414 | Transducin-like enhancer of split 1, homolog of Drosophila E(spl)                                                   | 1.845 | 0.0297 |
| 14309 | Expressed sequence AI315068                                                                                         | 1.845 | 0.0237 |
| 5248  | Proteasome (prosome, macropain) subunit, beta type 4                                                                | 1.845 | 0.0245 |
| 8815  | Golgi associated PDZ and coiled-coil motif containing                                                               | 1.844 | 0.0434 |
| 15190 | Adaptor protein complex AP-1, sigma 1                                                                               | 1.844 | 0.0337 |
| 5165  | Neuraminidase 1                                                                                                     | 1.843 | 0.0458 |
| 1398  | Cyclin E2                                                                                                           | 1.841 | 0.0245 |
| 19636 | ARP3 actin-related protein 3 homolog (yeast)                                                                        | 1.841 | 0.0402 |
| 6298  | Karyopherin (importin) alpha 3                                                                                      | 1.840 | 0.0297 |
| 19403 | RIKEN cDNA 1700047N06 gene                                                                                          | 1.840 | 0.0337 |
| 17648 | Ubiquitin specific protease 45                                                                                      | 1.838 | 0.0297 |
| 9367  | Alkylglycerone phosphate synthase                                                                                   | 1.835 | 0.0245 |
| 17983 | Vacuolar protein sorting 29 (S. pombe)                                                                              | 1.835 | 0.0365 |
| 7271  | Gene model 1564, (NCBI)                                                                                             | 1.835 | 0.0458 |
| 7208  | Dynamamin 1-like                                                                                                    | 1.834 | 0.0434 |
| 22173 | Hydroxysteroid (17-beta) dehydrogenase 12                                                                           | 1.834 | 0.0264 |
| 15291 | Superkiller viralicidic activity 2-like 2 (S. cerevisiae)                                                           | 1.834 | 0.0190 |
| 11885 | DNA segment, Chr 15, ERATO Doi 785, expressed                                                                       | 1.832 | 0.0337 |
| 4355  | RIKEN cDNA 0610009E20 gene                                                                                          | 1.831 | 0.0299 |
| 13171 | Stress-induced phosphoprotein 1                                                                                     | 1.830 | 0.0299 |
| 22121 | Nuclear receptor coactivator 2                                                                                      | 1.830 | 0.0365 |
| 18800 | RIKEN cDNA 1110018O08 gene                                                                                          | 1.829 | 0.0297 |
| 10338 | BPY2 interacting protein 1                                                                                          | 1.829 | 0.0299 |
| 21007 | Protein phosphatase 4, regulatory subunit 1                                                                         | 1.828 | 0.0299 |
| 20674 | 3-hydroxy-3-methylglutaryl-Coenzyme A lyase                                                                         | 1.827 | 0.0402 |
| 14464 | neuron navigator 1                                                                                                  | 1.827 | 0.0190 |
| 13201 | SA rat hypertension-associated homolog                                                                              | 1.826 | 0.0299 |
| 13543 | DEAH (Asp-Glu-Ala-His) box polypeptide 40                                                                           | 1.824 | 0.0245 |
| 21950 | Lectin, galactoside-binding, soluble, 3 binding protein                                                             | 1.824 | 0.0365 |
| 20124 | Chromosome condensation 1-like<br>transcribed sequence with weak similarity to protein ref:NP_081764.1 (M.musculus) | 1.823 | 0.0337 |
| 12140 | RIKEN cDNA 5730493B19 [Mus musculus]                                                                                | 1.821 | 0.0297 |
| 11406 | RIKEN cDNA 1200004M23 gene                                                                                          | 1.821 | 0.0245 |
| 21431 | ESTs BM195385                                                                                                       | 1.821 | 0.0245 |
| 18020 | Gene model 603, (NCBI)                                                                                              | 1.820 | 0.0337 |
| 11698 | SH3 domain binding glutamic acid-rich protein-like 3                                                                | 1.820 | 0.0458 |

|       |                                                               |       |        |
|-------|---------------------------------------------------------------|-------|--------|
| 12455 | SH3-domain binding protein 4                                  | 1.820 | 0.0365 |
| 18829 | MAD homolog 4 (Drosophila)                                    | 1.815 | 0.0337 |
| 4344  | Progesterone receptor membrane component 1                    | 1.815 | 0.0245 |
| 19581 | ribosomal protein S17                                         | 1.814 | 0.0190 |
| 12399 | Zinc finger protein 131                                       | 1.813 | 0.0264 |
| 14274 | hypothetical protein D430005B17                               | 1.813 | 0.0219 |
| 14973 | Thyroid hormone receptor interactor 4                         | 1.811 | 0.0237 |
| 8677  | Mitogen activated protein kinase kinase kinase 4              | 1.810 | 0.0237 |
| 15855 | gene trap locus 6                                             | 1.810 | 0.0190 |
| 16136 | Tumor necrosis factor, alpha-induced protein 2                | 1.808 | 0.0365 |
| 61    | RIKEN cDNA 9430034D17 gene                                    | 1.807 | 0.0458 |
| 451   | CCR4-NOT transcription complex, subunit 1                     | 1.806 | 0.0337 |
| 21280 | RIKEN cDNA 9830160H19 gene                                    | 1.805 | 0.0434 |
| 1202  | Polo-like kinase 3 (Drosophila)                               | 1.805 | 0.0337 |
| 17287 | Kelch-like 6 (Drosophila)                                     | 1.802 | 0.0299 |
| 22311 | RIKEN cDNA A830007P12 gene                                    | 1.800 | 0.0402 |
| 5293  | Hypothetical protein E130101M22                               | 1.800 | 0.0245 |
| 16366 | Mitogen activated protein kinase 14                           | 1.799 | 0.0245 |
| 10115 | RIKEN cDNA 2210409M21 gene                                    | 1.796 | 0.0299 |
| 20292 | E2F transcription factor 5                                    | 1.796 | 0.0297 |
| 14497 | RIKEN cDNA D230019N24 gene                                    | 1.795 | 0.0190 |
| 18097 | RIKEN cDNA E030041M21 gene                                    | 1.794 | 0.0297 |
| 6925  | RIKEN cDNA 1200014M14 gene                                    | 1.794 | 0.0299 |
| 13809 | Calcium/calmodulin-dependent protein kinase II gamma          | 1.793 | 0.0458 |
| 17524 | RIKEN cDNA B430108F07 gene                                    | 1.793 | 0.0337 |
| 20095 | Splicing factor, arginine/serine-rich 11                      | 1.793 | 0.0190 |
| 7387  | Zinc finger, RAN-binding domain containing 1                  | 1.791 | 0.0190 |
| 9468  | CDNA sequence BC023151                                        | 1.790 | 0.0297 |
| 1078  | Ets variant gene 3                                            | 1.790 | 0.0365 |
| 3247  | Coronin 7                                                     | 1.789 | 0.0297 |
| 19822 | similar to TATA element modulatory factor 1 (LOC232286), mRNA | 1.789 | 0.0297 |
| 16794 | RIKEN cDNA 2010305A19 gene                                    | 1.788 | 0.0458 |
| 5398  | Hypothetical protein 4930565O14                               | 1.785 | 0.0299 |
| 18141 | DNA segment, Chr 5, Wayne State University 178, expressed     | 1.784 | 0.0434 |
| 20040 | Angiotensin II, type I receptor-associated protein            | 1.784 | 0.0402 |
| 14894 | SMC6 structural maintenance of chromosomes 6-like 1 (yeast)   | 1.784 | 0.0297 |
| 7973  | cDNA sequence BC011426                                        | 1.781 | 0.0190 |
| 6681  | RIKEN cDNA 0610040B21 gene                                    | 1.781 | 0.0402 |
| 3886  | Nucleoporin 54                                                | 1.781 | 0.0237 |
| 5816  | anti-Mullerian hormone type 2 receptor                        | 1.780 | 0.0337 |
| 20444 | Hypothetical protein 6530404F10Rik                            | 1.780 | 0.0299 |
| 4551  | Mevalonate kinase                                             | 1.779 | 0.0365 |
| 10133 | Expressed sequence AU019823                                   | 1.778 | 0.0237 |
| 19874 | SH3-domain kinase binding protein 1                           | 1.777 | 0.0337 |
| 6225  | CDNA sequence BC026744                                        | 1.777 | 0.0434 |
| 20063 | RIKEN cDNA C730049F20 gene                                    | 1.774 | 0.0365 |
| 16480 | Vinculin                                                      | 1.772 | 0.0337 |
| 15946 | Fas-associated factor 1                                       | 1.770 | 0.0365 |
| 4088  | kinesin family member 18A                                     | 1.770 | 0.0297 |
| 16505 | DNA segment, Chr 5, ERATO Doi 40, expressed                   | 1.769 | 0.0337 |
| 19834 | Heme binding protein 1                                        | 1.768 | 0.0299 |
| 3701  | RIKEN cDNA 4933434E20 gene                                    | 1.767 | 0.0299 |
| 17587 | Phosphatidylinositol glycan, class A                          | 1.767 | 0.0299 |
| 7847  | Polymerase (DNA directed), delta 1, catalytic subunit         | 1.766 | 0.0219 |

|       |                                                                        |       |        |
|-------|------------------------------------------------------------------------|-------|--------|
| 9466  | RIKEN cDNA 1110008L16 gene                                             | 1.765 | 0.0245 |
| 15163 | RIKEN cDNA 1300006C19 gene                                             | 1.765 | 0.0237 |
| 6319  | RIKEN cDNA 1200015A19 gene                                             | 1.764 | 0.0264 |
| 7629  | Heat shock 70kDa protein 12A                                           | 1.762 | 0.0402 |
| 4320  | Ubiquitin specific protease 3                                          | 1.762 | 0.0297 |
| 6597  | MYST histone acetyltransferase 2                                       | 1.761 | 0.0245 |
| 1367  | Gene model 493, (NCBI)                                                 | 1.759 | 0.0434 |
| 17697 | Tankyrase 1 binding protein 1                                          | 1.759 | 0.0337 |
| 16722 | platelet-activating factor acetylhydrolase, isoform 1b, alpha2 subunit | 1.756 | 0.0299 |
| 14279 | CDNA sequence AK122525                                                 | 1.755 | 0.0299 |
| 19544 | RIKEN cDNA 6330416G13 gene                                             | 1.754 | 0.0245 |
| 8696  | DnaJ (Hsp40) homolog, subfamily B, member 10                           | 1.753 | 0.0297 |
| 21743 | Nudix (nucleoside diphosphate linked moiety X)-type motif 5            | 1.753 | 0.0245 |
| 8438  | Gem (nuclear organelle) associated protein 5                           | 1.750 | 0.0434 |
| 9437  | RIKEN cDNA C130089K02 gene                                             | 1.749 | 0.0365 |
| 7167  | WD repeat domain 21                                                    | 1.749 | 0.0458 |
| 22073 | RIKEN cDNA 2600010L24 gene                                             | 1.748 | 0.0297 |
| 16513 | CDNA sequence BC051080                                                 | 1.747 | 0.0219 |
| 16674 | Autophagy 7-like ( <i>S. cerevisiae</i> )                              | 1.747 | 0.0365 |
| 9923  | Nuclear fragile X mental retardation protein interacting protein       | 1.747 | 0.0237 |
| 5478  | RIKEN cDNA 1200009B18 gene                                             | 1.747 | 0.0337 |
| 21017 | Ataxin 7-like 4                                                        | 1.745 | 0.0337 |
| 2142  | Nodal modulator 1                                                      | 1.744 | 0.0237 |
| 7176  | RIKEN cDNA 9630045H20 gene                                             | 1.744 | 0.0237 |
| 3417  | Ring finger protein 141                                                | 1.744 | 0.0299 |
| 1954  | Ring finger protein 12                                                 | 1.743 | 0.0190 |
| 18637 | PDZ and LIM domain 7                                                   | 1.743 | 0.0337 |
| 14852 | Chemokine-like factor super family 8                                   | 1.742 | 0.0299 |
| 7141  | RIKEN cDNA 1110021E09 gene                                             | 1.741 | 0.0190 |
| 10867 | Prostaglandin-endoperoxide synthase 1                                  | 1.741 | 0.0365 |
| 13644 | RIKEN cDNA F830004D09 gene                                             | 1.740 | 0.0299 |
| 20914 | Lymphocyte antigen 75                                                  | 1.738 | 0.0299 |
| 13620 | zinc finger protein 386 (Kruppel-like)                                 | 1.737 | 0.0190 |
| 4513  | RNA, U22 small nucleolar                                               | 1.737 | 0.0299 |
| 14798 | RIKEN cDNA 1810074P20 gene                                             | 1.736 | 0.0402 |
| 21071 | RIKEN cDNA 1700029B21 gene                                             | 1.736 | 0.0297 |
| 20025 | TBC1 domain family, member 13                                          | 1.736 | 0.0365 |
| 21776 | ESTs C78717                                                            | 1.736 | 0.0245 |
| 10340 | zinc finger protein 198                                                | 1.736 | 0.0434 |
| 20920 | RIKEN cDNA E130016E03 gene                                             | 1.736 | 0.0245 |
| 21718 | Inositol 1,3,4-triphosphate 5/6 kinase                                 | 1.735 | 0.0337 |
| 6771  | Zinc finger protein 482                                                | 1.732 | 0.0237 |
| 8852  | TAP binding protein-like                                               | 1.732 | 0.0337 |
| 20041 | McKusick-Kaufman syndrome protein                                      | 1.732 | 0.0402 |
| 1943  | Cell division cycle associated 2                                       | 1.730 | 0.0337 |
| 11192 | Isocitrate dehydrogenase 3 (NAD+), gamma                               | 1.729 | 0.0365 |
| 9683  | RIKEN cDNA 2810407E01 gene                                             | 1.729 | 0.0434 |
| 19063 | CDNA sequence BC021438                                                 | 1.728 | 0.0434 |
| 2172  | RIKEN cDNA C330018L13 gene                                             | 1.728 | 0.0299 |
| 20410 | Uridine monophosphate synthetase                                       | 1.727 | 0.0264 |
| 16879 | Exocyst complex component 8                                            | 1.727 | 0.0297 |
| 6783  | Neuropilin 2                                                           | 1.727 | 0.0245 |
| 12904 | Chromatin modifying protein 2B                                         | 1.726 | 0.0245 |
| 14969 | RIKEN cDNA 0610042C05 gene                                             | 1.726 | 0.0402 |



|       |                                                                                     |       |        |
|-------|-------------------------------------------------------------------------------------|-------|--------|
| 15299 | RIKEN cDNA 0610025O11 gene                                                          | 1.725 | 0.0299 |
| 4035  | Ribosomal protein L23                                                               | 1.723 | 0.0299 |
| 630   | RIKEN cDNA 8030451K01 gene                                                          | 1.722 | 0.0299 |
| 18850 | tumor necrosis factor receptor superfamily, member 1b                               | 1.720 | 0.0299 |
| 17230 | Leukocyte receptor cluster (LRC) member 4                                           | 1.719 | 0.0458 |
| 10838 | Dynein, cytoplasmic, intermediate chain 2                                           | 1.718 | 0.0299 |
| 1284  | perlecan (heparan sulfate proteoglycan 2)                                           | 1.717 | 0.0299 |
| 2416  | RIKEN cDNA 2810037C03 gene                                                          | 1.717 | 0.0237 |
| 11282 | RIKEN cDNA 2310066E14 gene                                                          | 1.714 | 0.0297 |
| 5684  | Pleckstrin homology domain interacting protein                                      | 1.713 | 0.0434 |
| 2459  | Epidermal growth factor receptor pathway substrate 15, related sequence             | 1.712 | 0.0299 |
| 16764 | Ubiquitination factor E4A, UFD2 homolog (S. cerevisiae)                             | 1.712 | 0.0365 |
| 4321  | O-acetyltransferase                                                                 | 1.710 | 0.0190 |
| 15825 | RIKEN cDNA 2310003L22 gene                                                          | 1.709 | 0.0245 |
| 19772 | Breast cancer 1                                                                     | 1.708 | 0.0264 |
| 12700 | RIKEN cDNA 3300001P08 gene                                                          | 1.708 | 0.0299 |
| 5841  | RIKEN cDNA 1810020C19 gene                                                          | 1.707 | 0.0402 |
| 15076 | Protein-L-isoaspartate (D-aspartate) O-methyltransferase 1                          | 1.706 | 0.0299 |
| 14520 | TruB pseudouridine (psi) synthase homolog 2 (E. coli)                               | 1.705 | 0.0337 |
| 16254 | ATP synthase, H+ transporting, mitochondrial F0 complex, subunit d                  | 1.705 | 0.0297 |
| 13841 | Iduronate 2-sulfatase                                                               | 1.705 | 0.0337 |
| 11616 | Transcription factor Dp 1                                                           | 1.704 | 0.0402 |
| 12135 | RIKEN cDNA 4632434I11 gene                                                          | 1.703 | 0.0264 |
| 20995 | ESTs AA407555                                                                       | 1.702 | 0.0402 |
| 12828 | Sorting nexin 13                                                                    | 1.702 | 0.0237 |
| 18984 | Tafazzin                                                                            | 1.702 | 0.0264 |
| 18595 | RIKEN cDNA 1300007F04 gene                                                          | 1.701 | 0.0297 |
| 12648 | embryonic epithelial gene 1                                                         | 1.701 | 0.0402 |
| 13807 | RIKEN cDNA B230339H12 gene                                                          | 1.701 | 0.0297 |
| 18070 | RIKEN cDNA 5830472F04 gene                                                          | 1.701 | 0.0337 |
| 15110 | Zinc and ring finger 2                                                              | 1.701 | 0.0299 |
| 229   | Unknown (protein for IMAGE:5696235)                                                 | 1.701 | 0.0190 |
| 7058  | Glycogen synthase 3, brain                                                          | 1.700 | 0.0402 |
| 22204 | RIKEN cDNA 2700019D07 gene                                                          | 1.700 | 0.0190 |
| 18176 | RIKEN cDNA 5730405M06 gene                                                          | 1.700 | 0.0299 |
| 10545 | Kringle containing transmembrane protein 1                                          | 1.699 | 0.0237 |
| 12569 | Eukaryotic translation initiation factor 2B, subunit 3                              | 1.698 | 0.0297 |
| 10627 | Putative homeodomain transcription factor 2                                         | 1.697 | 0.0365 |
| 11487 | Expressed sequence C78541                                                           | 1.697 | 0.0264 |
| 11283 | RAB interacting factor                                                              | 1.697 | 0.0297 |
| 16427 | DNA segment, Chr 13, Wayne State University 64, expressed                           | 1.696 | 0.0337 |
| 11071 | RIKEN cDNA 2810452K22 gene                                                          | 1.696 | 0.0299 |
| 33    | Tubulin, gamma complex associated protein 2                                         | 1.695 | 0.0365 |
| 16160 | Aldolase 1, A isoform                                                               | 1.695 | 0.0458 |
| 12377 | RIKEN cDNA 4933411K20 gene                                                          | 1.694 | 0.0337 |
| 9242  | RIKEN cDNA 0610012D09 gene                                                          | 1.693 | 0.0402 |
| 17596 | DOM-3 homolog Z (C. elegans)                                                        | 1.692 | 0.0264 |
| 20852 | FLN29 gene product                                                                  | 1.692 | 0.0264 |
| 13600 | Colony stimulating factor 2 receptor, beta 2, low-affinity (granulocyte-macrophage) | 1.691 | 0.0365 |
| 18811 | RIKEN cDNA 4432411E13 gene                                                          | 1.689 | 0.0434 |
| 17138 | CDNA sequence BC053440                                                              | 1.687 | 0.0434 |
| 19825 | RIKEN cDNA 4921511H13 gene                                                          | 1.687 | 0.0299 |
| 3648  | RIKEN cDNA 5830434P21 gene                                                          | 1.687 | 0.0402 |
| 18245 | RIKEN cDNA 1110056N09 gene                                                          | 1.687 | 0.0299 |

|       |                                                                                       |       |        |
|-------|---------------------------------------------------------------------------------------|-------|--------|
| 18034 | Dynein, cytoplasmic, light intermediate polypeptide 2                                 | 1.686 | 0.0264 |
| 6270  | Succinate-CoA ligase, GDP-forming, alpha subunit                                      | 1.684 | 0.0337 |
| 4095  | cyclin A2                                                                             | 1.682 | 0.0297 |
| 1107  | Expressed sequence AI429612                                                           | 1.681 | 0.0299 |
| 5322  | Rac/Cdc42 guanine nucleotide exchange factor (GEF) 6                                  | 1.681 | 0.0297 |
| 6813  | Thyroid hormone receptor associated protein 3                                         | 1.681 | 0.0237 |
| 7608  | RIKEN cDNA 9930021J03 gene                                                            | 1.680 | 0.0434 |
| 15843 | F-box protein 42                                                                      | 1.679 | 0.0402 |
| 11838 | CCR4-NOT transcription complex, subunit 6                                             | 1.679 | 0.0297 |
| 444   | RIKEN cDNA 2700059D21 gene                                                            | 1.679 | 0.0245 |
| 3074  | SEC23A ( <i>S. cerevisiae</i> )                                                       | 1.678 | 0.0299 |
| 15496 | Spectrin beta 2                                                                       | 1.678 | 0.0365 |
| 13973 | Expressed sequence AI256624                                                           | 1.678 | 0.0299 |
| 4994  | similar to mKIAA0185 protein (LOC381227), mRNA                                        | 1.677 | 0.0299 |
| 18171 | Tumor protein, translationally-controlled 1                                           | 1.676 | 0.0402 |
| 746   | Zinc finger protein 655                                                               | 1.676 | 0.0365 |
| 22151 | RIKEN cDNA 5730469D23 gene                                                            | 1.675 | 0.0297 |
| 14495 | Regulating synaptic membrane exocytosis 2                                             | 1.675 | 0.0245 |
| 15652 | Activating signal cointegrator 1 complex subunit 2                                    | 1.674 | 0.0297 |
| 8650  | similar to 60S ribosomal protein L11 (LOC328825), mRNA                                | 1.669 | 0.0299 |
| 9736  | Ubiquitin protein ligase E3A                                                          | 1.668 | 0.0237 |
| 10369 | Ribosomal protein S21                                                                 | 1.666 | 0.0337 |
| 16543 | Transmembrane protein 33                                                              | 1.665 | 0.0365 |
| 14732 | RIKEN cDNA 5730403H17 gene                                                            | 1.665 | 0.0245 |
| 16635 | Zinc finger protein 142                                                               | 1.664 | 0.0337 |
| 3929  | RIKEN cDNA 1110057K04 gene                                                            | 1.662 | 0.0365 |
| 2616  | RIKEN cDNA 4930519P11 gene                                                            | 1.662 | 0.0365 |
| 21939 | RIKEN cDNA 9130011E15 gene                                                            | 1.660 | 0.0299 |
| 15158 | Mus musculus hypothetical LOC223827 (LOC223827), mRNA                                 | 1.659 | 0.0264 |
| 2313  | Janus kinase 2                                                                        | 1.659 | 0.0299 |
| 8747  | RIKEN cDNA 4732496O08 gene                                                            | 1.658 | 0.0190 |
| 12513 | Protein tyrosine phosphatase, receptor-type, F interacting protein, binding protein 2 | 1.657 | 0.0434 |
| 11855 | SEC15-like 1 ( <i>S. cerevisiae</i> )                                                 | 1.656 | 0.0245 |
| 8342  | Signal recognition particle 68                                                        | 1.655 | 0.0299 |
| 15726 | Protein kinase D2                                                                     | 1.655 | 0.0337 |
| 10091 | RIKEN cDNA 5730410I19 gene                                                            | 1.654 | 0.0337 |
| 16698 | Ngfi-A binding protein 1                                                              | 1.654 | 0.0337 |
| 11550 | RIKEN cDNA 0610039N19 gene                                                            | 1.654 | 0.0337 |
| 3409  | RIKEN cDNA 1110020P09 gene                                                            | 1.654 | 0.0297 |
| 17640 | RIKEN cDNA 1110020G09 gene                                                            | 1.652 | 0.0434 |
| 20756 | Zinc finger protein 85, related sequence 1                                            | 1.650 | 0.0299 |
| 9101  | serine protease inhibitor, Kunitz type 1                                              | 1.650 | 0.0297 |
| 4302  | Acetyl-Coenzyme A acetyltransferase 1                                                 | 1.647 | 0.0458 |
| 21701 | Transcription factor 4                                                                | 1.646 | 0.0365 |
|       | Mus musculus transcribed sequence with strong similarity to protein pir:I38346        |       |        |
| 16240 | ( <i>H.sapiens</i> ) I38346 elastic titin - human (fragment)                          | 1.646 | 0.0245 |
| 4522  | Carboxypeptidase X 1 (M14 family)                                                     | 1.645 | 0.0299 |
| 5860  | Pyruvate dehydrogenase complex, component X                                           | 1.645 | 0.0365 |
| 9084  | RIKEN cDNA 3830405G04 gene                                                            | 1.644 | 0.0299 |
| 14641 | Activating transcription factor 2                                                     | 1.644 | 0.0402 |
| 15403 | Stromal cell derived factor receptor 2                                                | 1.644 | 0.0245 |
| 7390  | Retinoid X receptor interacting protein 110                                           | 1.644 | 0.0245 |
| 17961 | Sphingomyelin phosphodiesterase 1, acid lysosomal                                     | 1.643 | 0.0434 |
| 5556  | Glyoxalase 1                                                                          | 1.643 | 0.0365 |

|       |                                                                                       |       |        |
|-------|---------------------------------------------------------------------------------------|-------|--------|
| 14700 | Lin 7 homolog c ( <i>C. elegans</i> )                                                 | 1.643 | 0.0365 |
| 8473  | RIKEN cDNA 2610208M17 gene                                                            | 1.642 | 0.0299 |
| 10110 | Breakpoint cluster region homolog                                                     | 1.642 | 0.0297 |
| 14878 | Coiled-coil domain containing 16                                                      | 1.640 | 0.0402 |
| 20564 | RAN binding protein 5                                                                 | 1.638 | 0.0402 |
| 3746  | RIKEN cDNA 2510049I19 gene                                                            | 1.636 | 0.0299 |
| 19485 | RIKEN cDNA 2310042M24 gene                                                            | 1.634 | 0.0402 |
| 10326 | Transmembrane channel-like gene family 6                                              | 1.634 | 0.0299 |
| 12649 | ring finger protein 26                                                                | 1.633 | 0.0337 |
| 19547 | WD repeat domain 36                                                                   | 1.633 | 0.0402 |
| 6080  | OCIA domain containing 1                                                              | 1.632 | 0.0299 |
| 9912  | Zinc finger, DHHC domain containing 7                                                 | 1.630 | 0.0190 |
| 6213  | RIKEN cDNA A230054D04 gene                                                            | 1.627 | 0.0297 |
| 16335 | Cofactor required for Sp1 transcriptional activation, subunit 6                       | 1.627 | 0.0434 |
| 15928 | Nardilysin, N-arginine dibasic convertase, NRD convertase 1                           | 1.626 | 0.0434 |
| 8872  | RIKEN cDNA 5430428G01 gene                                                            | 1.625 | 0.0299 |
| 16377 | SET and MYND domain containing 3                                                      | 1.624 | 0.0434 |
| 11965 | F-box and WD-40 domain protein 7, archipelago homolog ( <i>Drosophila</i> )           | 1.623 | 0.0297 |
| 16510 | 5-azacytidine induced gene 2                                                          | 1.623 | 0.0337 |
| 13784 | RIKEN cDNA 5830434P21 gene                                                            | 1.622 | 0.0337 |
| 22153 | RIKEN cDNA 1700123O20 gene                                                            | 1.621 | 0.0264 |
| 20248 | Protein kinase, cAMP dependent, catalytic, beta                                       | 1.621 | 0.0365 |
| 13625 | Epidermal growth factor                                                               | 1.620 | 0.0297 |
| 3883  | RIKEN cDNA 5730405M06 gene                                                            | 1.619 | 0.0402 |
| 7291  | Casein kinase 1, gamma 1                                                              | 1.619 | 0.0337 |
| 6388  | FUN14 domain containing 2                                                             | 1.617 | 0.0458 |
| 16255 | RIKEN cDNA 2410008K03 gene                                                            | 1.617 | 0.0434 |
| 8720  | Isovaleryl coenzyme A dehydrogenase                                                   | 1.616 | 0.0365 |
| 14314 | THAP domain containing 7                                                              | 1.615 | 0.0245 |
| 4718  | Dual specificity phosphatase 16                                                       | 1.615 | 0.0402 |
| 12625 | Limb-bud and heart                                                                    | 1.615 | 0.0434 |
| 17419 | Muscle glycogen phosphorylase                                                         | 1.613 | 0.0458 |
| 15802 | Thioredoxin domain containing 4 (endoplasmic reticulum)                               | 1.612 | 0.0299 |
| 15049 | RNA pseudouridylate synthase domain containing 4                                      | 1.612 | 0.0458 |
| 6253  | PRP31 pre-mRNA processing factor 31 homolog (yeast)                                   | 1.610 | 0.0365 |
| 12525 | CDNA sequence AK129128                                                                | 1.610 | 0.0299 |
| 16861 | U2 small nuclear ribonucleoprotein auxiliary factor (U2AF) 1, related sequence 2      | 1.609 | 0.0337 |
| 6693  | CDNA sequence BC026590                                                                | 1.606 | 0.0434 |
| 7172  | Dihydrolipoamide S-acetyltransferase (E2 component of pyruvate dehydrogenase complex) | 1.605 | 0.0297 |
| 5583  | ADP-ribosylation factor interacting protein 2                                         | 1.605 | 0.0337 |
| 15713 | golgi SNAP receptor complex member 2                                                  | 1.604 | 0.0190 |
| 13746 | RIKEN cDNA 9030418K01 gene                                                            | 1.603 | 0.0365 |
| 19958 | Methyl-CpG binding domain protein 1                                                   | 1.602 | 0.0434 |
| 12444 | RIKEN cDNA 8030443L12 gene                                                            | 1.602 | 0.0434 |
| 15503 | Sorting nexin family member 27                                                        | 1.600 | 0.0337 |
| 18397 | Expressed sequence AL024069                                                           | 1.600 | 0.0299 |
| 14524 | Casein kinase 1, alpha 1                                                              | 1.600 | 0.0245 |
| 11836 | Solute carrier family 7 (cationic amino acid transporter, y+ system), member 6        | 1.599 | 0.0337 |
| 5656  | RIKEN cDNA 6330583M11 gene                                                            | 1.599 | 0.0365 |
| 11536 | RIKEN cDNA 0610033I05 gene                                                            | 1.598 | 0.0264 |
| 15395 | Lysyl-tRNA synthetase                                                                 | 1.598 | 0.0337 |
| 881   | RIKEN cDNA 2310057G13 gene                                                            | 1.597 | 0.0458 |
| 20029 | CDNA sequence BC024806                                                                | 1.595 | 0.0337 |

|       |                                                                                                                    |       |        |
|-------|--------------------------------------------------------------------------------------------------------------------|-------|--------|
|       | transcribed sequence with weak similarity to protein ref:NP_081764.1 (M.musculus)                                  |       |        |
| 18786 | RIKEN cDNA 5730493B19 [Mus musculus]<br>C0194A11-3 NIA Mouse E7.5 Extraembryonic Portion cDNA Library Mus musculus | 1.594 | 0.0434 |
| 19673 | cDNA clone C0194A11 3', MRNA sequence                                                                              | 1.593 | 0.0337 |
| 15873 | Survival motor neuron domain containing 1                                                                          | 1.592 | 0.0402 |
| 13786 | Zinc finger protein 294                                                                                            | 1.592 | 0.0299 |
| 7958  | CDNA sequence BC024683                                                                                             | 1.587 | 0.0337 |
| 17095 | RIKEN cDNA 2410043F08 gene                                                                                         | 1.584 | 0.0299 |
| 16998 | CDNA sequence BC023829                                                                                             | 1.584 | 0.0402 |
| 14756 | Casitas B-lineage lymphoma-like 1                                                                                  | 1.584 | 0.0245 |
| 21770 | ATP synthase, H+ transporting, mitochondrial F0 complex, subunit F                                                 | 1.581 | 0.0245 |
| 19393 | Protein phosphatase 4, regulatory subunit 2                                                                        | 1.581 | 0.0434 |
| 5957  | Nucleoporin 88                                                                                                     | 1.580 | 0.0402 |
| 15457 | Expressed sequence AA415817<br>G0120G06-3 NIA Mouse E7.5 Embryonic Portion cDNA Library Mus musculus cDNA          | 1.580 | 0.0297 |
| 689   | clone G0120G06 3', MRNA sequence                                                                                   | 1.580 | 0.0190 |
| 13424 | Pyrroline-5-carboxylate reductase-like                                                                             | 1.578 | 0.0337 |
| 13867 | F-box only protein 8                                                                                               | 1.578 | 0.0299 |
| 12790 | RIKEN cDNA B930068K11 gene                                                                                         | 1.574 | 0.0365 |
| 11116 | Mus musculus cDNA clone IMAGE:5689029, partial cds                                                                 | 1.573 | 0.0337 |
| 739   | UDP-N-acetyl-alpha-D-galactosamine:polypeptide N-acetylgalactosaminyltransferase 1                                 | 1.569 | 0.0434 |
| 11806 | Testis expressed gene 264                                                                                          | 1.569 | 0.0299 |
| 6190  | Eukaryotic translation termination factor 1                                                                        | 1.568 | 0.0299 |
| 19194 | EST BM235972                                                                                                       | 1.566 | 0.0337 |
| 21076 | RIKEN cDNA 2700049P18 gene                                                                                         | 1.562 | 0.0434 |
| 13182 | Chaperonin subunit 4 (delta)                                                                                       | 1.560 | 0.0434 |
| 10399 | Alanyl-tRNA synthetase                                                                                             | 1.560 | 0.0458 |
| 8084  | DNA segment, Chr 10, Johns Hopkins University 81 expressed                                                         | 1.559 | 0.0402 |
| 21504 | RAB22A, member RAS oncogene family                                                                                 | 1.558 | 0.0434 |
| 18156 | Vesicle transport through interaction with t-SNAREs homolog 1A (yeast)                                             | 1.556 | 0.0458 |
| 5876  | Shwachman-Bodian-Diamond syndrome homolog (human)                                                                  | 1.556 | 0.0245 |
| 8869  | Transcription factor EC                                                                                            | 1.554 | 0.0365 |
| 21707 | CCNDBP1 interactor                                                                                                 | 1.553 | 0.0434 |
| 11193 | CDNA sequence BC040823                                                                                             | 1.553 | 0.0402 |
| 13649 | RIKEN cDNA B330012G18 gene                                                                                         | 1.551 | 0.0402 |
| 10556 | RIKEN cDNA 3110048L19 gene                                                                                         | 1.550 | 0.0245 |
| 17669 | Leucine rich repeat (in FLII) interacting protein 2                                                                | 1.550 | 0.0458 |
| 11915 | Copine I                                                                                                           | 1.549 | 0.0365 |
| 15262 | ATP synthase mitochondrial F1 complex assembly factor 2                                                            | 1.548 | 0.0458 |
| 20644 | Expressed sequence AA517853                                                                                        | 1.548 | 0.0365 |
| 9175  | Expressed sequence AI461788                                                                                        | 1.546 | 0.0458 |
| 9351  | Zinc finger protein 148                                                                                            | 1.544 | 0.0434 |
| 16904 | Mus musculus cDNA clone MGC:59529 IMAGE:6336581, complete cds                                                      | 1.544 | 0.0299 |
| 14754 | PRP31 pre-mRNA processing factor 31 homolog (yeast)                                                                | 1.544 | 0.0434 |
| 6437  | Nucleosome assembly protein 1-like 4                                                                               | 1.543 | 0.0365 |
| 12343 | Eukaryotic translation initiation factor 4, gamma 1                                                                | 1.543 | 0.0458 |
| 14295 | Aurora kinase A                                                                                                    | 1.542 | 0.0365 |
| 17274 | RIKEN cDNA 2900057K09 gene                                                                                         | 1.542 | 0.0434 |
| 11201 | RIKEN cDNA A830039H10 gene                                                                                         | 1.542 | 0.0337 |
| 13788 | RIKEN cDNA 1110067M05 gene                                                                                         | 1.541 | 0.0299 |
| 14895 | Metastasis associated 3                                                                                            | 1.539 | 0.0434 |
| 14882 | Translin                                                                                                           | 1.539 | 0.0402 |
| 16476 | adenylate kinase 3 alpha-like                                                                                      | 1.537 | 0.0458 |
| 10431 | Cardiomyopathy associated 1                                                                                        | 1.535 | 0.0299 |

|       |                                                                           |       |        |
|-------|---------------------------------------------------------------------------|-------|--------|
| 22175 | Testis-specific protein, Y-encoded-like 1                                 | 1.531 | 0.0458 |
| 4952  | Shc SH2-domain binding protein 1                                          | 1.531 | 0.0434 |
| 15143 | NADH dehydrogenase (ubiquinone) Fe-S protein 2                            | 1.530 | 0.0402 |
| 10223 | Amyloid beta precursor protein (cytoplasmic tail) binding protein 2       | 1.525 | 0.0434 |
| 16828 | Protein tyrosine phosphatase, non-receptor type 23                        | 1.525 | 0.0402 |
| 21717 | RIKEN cDNA 5830468K18 gene                                                | 1.524 | 0.0299 |
| 19848 | Actin related protein 2/3 complex, subunit 2                              | 1.524 | 0.0434 |
| 2413  | RIKEN cDNA 2810017D21 gene                                                | 1.524 | 0.0337 |
| 13617 | Adaptor-related protein complex 1, sigma 2 subunit                        | 1.523 | 0.0402 |
| 15564 | Transmembrane 6 superfamily member 1                                      | 1.523 | 0.0434 |
| 13524 | Protein phosphatase 1, regulatory (inhibitor) subunit 7                   | 1.521 | 0.0434 |
| 9046  | ubiquitin specific protease 12                                            | 1.520 | 0.0434 |
| 15374 | CDNA sequence BC010304                                                    | 1.518 | 0.0299 |
| 12365 | Golgi apparatus protein 1                                                 | 1.517 | 0.0219 |
| 20244 | RIKEN cDNA 0610039A15 gene                                                | 1.516 | 0.0337 |
| 21230 | Parkinson disease (autosomal recessive, early onset) 7                    | 1.514 | 0.0434 |
| 10259 | Stress 70 protein chaperone, microsomal-associated, human homolog         | 1.509 | 0.0365 |
| 22252 | phosphoglycerate mutase 1                                                 | 1.507 | 0.0365 |
| 22320 | Phosphatidylinositol transfer protein, beta                               | 1.506 | 0.0297 |
| 15289 | CDNA sequence BC010584                                                    | 1.506 | 0.0434 |
| 20451 | RIKEN cDNA 1810013D10 gene                                                | 1.506 | 0.0297 |
| 4828  | Ubiquitin-conjugating enzyme E2N                                          | 1.503 | 0.0402 |
| 17047 | Ankyrin repeat and SAM domain containing 1                                | 1.502 | 0.0458 |
| 16137 | Forkhead box M1                                                           | 1.501 | 0.0237 |
| 14317 | Runt related transcription factor 2                                       | 1.501 | 0.0458 |
| 9866  | Expressed sequence AI413782                                               | 1.498 | 0.0337 |
| 22417 | Aldehyde dehydrogenase 3 family, member B1                                | 1.497 | 0.0458 |
| 19248 | Lysocardiolipin acyltransferase                                           | 1.496 | 0.0434 |
| 19571 | AarF domain containing kinase 1                                           | 1.494 | 0.0458 |
| 15346 | RIKEN cDNA 2700085E05 gene                                                | 1.493 | 0.0458 |
| 3331  | KDEL (Lys-Asp-Glu-Leu) endoplasmic reticulum protein retention receptor 1 | 1.493 | 0.0434 |
| 1326  | RIKEN cDNA 4933433P14 gene                                                | 1.489 | 0.0219 |
| 9915  | Host cell factor C1 regulator 1 (XPO1-dependent)                          | 1.488 | 0.0402 |
| 17865 | Nuclear cap binding protein subunit 1, 80kDa                              | 1.484 | 0.0402 |
| 13098 | M-phase phosphoprotein 1                                                  | 1.482 | 0.0365 |
| 18780 | Muskelin 1, intracellular mediator containing kelch motifs                | 1.478 | 0.0365 |
| 4531  | Retinoic acid induced 12                                                  | 1.475 | 0.0402 |
| 14491 | RIKEN cDNA D930043N17 gene                                                | 1.474 | 0.0434 |
| 15433 | Polymerase (RNA) II (DNA directed) polypeptide B                          | 1.469 | 0.0458 |
| 15563 | CLIP associating protein 1                                                | 1.468 | 0.0402 |
| 14446 | Glutamate-cysteine ligase , modifier subunit                              | 1.467 | 0.0337 |
| 8758  | Peroxisomal membrane protein 3                                            | 1.460 | 0.0365 |
| 10844 | Glutaminase                                                               | 1.457 | 0.0299 |
| 6930  | Transcription elongation factor B (SIII), polypeptide 3                   | 1.453 | 0.0434 |
| 4314  | Transmembrane emp24 protein transport domain containing 5                 | 1.451 | 0.0299 |
| 20977 | Myocyte enhancer factor 2B                                                | 1.449 | 0.0365 |
| 6508  | RIKEN cDNA 5730557L09 gene                                                | 1.446 | 0.0434 |
| 8115  | G patch domain containing 2                                               | 1.445 | 0.0402 |
| 20198 | Cornichon homolog (Drosophila)                                            | 1.443 | 0.0299 |
| 17206 | Cofilin 1, non-muscle                                                     | 1.438 | 0.0458 |
| 9469  | Citrate synthase                                                          | 1.433 | 0.0458 |
| 10892 | Methylenetetrahydrofolate dehydrogenase (NADP+ dependent) 1-like          | 1.430 | 0.0337 |
| 21569 | Small EDRK-rich factor 2                                                  | 1.429 | 0.0402 |
| 15319 | ESTs BM222786                                                             | 1.425 | 0.0365 |

|       |                                                   |       |        |
|-------|---------------------------------------------------|-------|--------|
| 17913 | Golgi SNAP receptor complex member 2              | 1.422 | 0.0458 |
| 14051 | THO complex 4                                     | 1.419 | 0.0458 |
| 15657 | Splicing factor, arginine/serine-rich 1 (ASF/SF2) | 1.412 | 0.0402 |
| 12478 | Zinc finger, DHHC domain containing 3             | 1.412 | 0.0337 |
| 16032 | Gem (nuclear organelle) associated protein 5      | 1.410 | 0.0434 |
| 13318 | SLIT-ROBO Rho GTPase activating protein 2         | 1.373 | 0.0365 |
| 10735 | ESTs BM117318                                     | 1.360 | 0.0458 |

**Supplemental Table II.** Genes with downregulated expression in BMBCs transplanted into I/R-injured hearts vs. sham-operated hearts.

| <b>Gene ID</b> | <b>Gene Name</b>                                                                                                                                                                                                           | <b>fold change</b> | <b>q-value</b> |
|----------------|----------------------------------------------------------------------------------------------------------------------------------------------------------------------------------------------------------------------------|--------------------|----------------|
| 7132           | Glutathione peroxidase 1                                                                                                                                                                                                   | 0.671              | 0.0365         |
| 5109           | RIKEN cDNA 2310061K06 gene                                                                                                                                                                                                 | 0.654              | 0.0434         |
| 16801          | RIKEN cDNA B430203M17 gene                                                                                                                                                                                                 | 0.654              | 0.0301         |
| 5528           | RIKEN cDNA D030015G18 gene                                                                                                                                                                                                 | 0.652              | 0.0458         |
| 14091          | Sperm associated antigen 7                                                                                                                                                                                                 | 0.649              | 0.0434         |
| 11734          | RIKEN cDNA 2810003C17 gene                                                                                                                                                                                                 | 0.641              | 0.0434         |
| 2351           | Dehydrogenase/reductase (SDR family) member 1                                                                                                                                                                              | 0.628              | 0.0458         |
| 12188          | E1A binding protein p400                                                                                                                                                                                                   | 0.624              | 0.0337         |
| 7048           | SEC14-like 1 ( <i>S. cerevisiae</i> )                                                                                                                                                                                      | 0.623              | 0.0365         |
| 14345          | RIKEN cDNA 3010033P07 gene                                                                                                                                                                                                 | 0.621              | 0.0402         |
| 7429           | CBFA2T1 identified gene homolog (human)                                                                                                                                                                                    | 0.611              | 0.0434         |
| 13293          | Morf4 family associated protein 1                                                                                                                                                                                          | 0.611              | 0.0402         |
| 18092          | ribosomal protein L26                                                                                                                                                                                                      | 0.600              | 0.0402         |
| 15212          | ESTs AU021001                                                                                                                                                                                                              | 0.599              | 0.0434         |
| 9274           | Mus musculus transcribed sequence with strong similarity to protein pir:S12207 ( <i>M.musculus</i> ) S12207 hypothetical protein (B2 element) - mouse transcribed sequence with weak similarity to protein ref:NP_081764.1 | 0.599              | 0.0365         |
| 11007          | ( <i>M.musculus</i> ) RIKEN cDNA 5730493B19 [ <i>Mus musculus</i> ]                                                                                                                                                        | 0.594              | 0.0297         |
| 19523          | Glutamate oxaloacetate transaminase 1, soluble                                                                                                                                                                             | 0.594              | 0.0337         |
| 4081           | Sec11-like 3 ( <i>S. cerevisiae</i> )                                                                                                                                                                                      | 0.585              | 0.0434         |
| 20751          | EST BG060719                                                                                                                                                                                                               | 0.584              | 0.0365         |
| 8318           | Suppressor of cytokine signaling 7                                                                                                                                                                                         | 0.582              | 0.0301         |
| 1878           | Heterochromatin protein 1, binding protein 3                                                                                                                                                                               | 0.575              | 0.0365         |
| 4452           | Protein tyrosine phosphatase, non-receptor type 12                                                                                                                                                                         | 0.562              | 0.0434         |
| 5652           | ESTs AU023291                                                                                                                                                                                                              | 0.561              | 0.0301         |
| 6988           | Homeo box B5                                                                                                                                                                                                               | 0.561              | 0.0260         |
| 10230          | actin, gamma, cytoplasmic                                                                                                                                                                                                  | 0.559              | 0.0434         |
| 305            | Syntaxin 16                                                                                                                                                                                                                | 0.558              | 0.0402         |
| 16920          | ESTs AW541810                                                                                                                                                                                                              | 0.557              | 0.0301         |
| 8279           | Jumonji domain containing 1A                                                                                                                                                                                               | 0.554              | 0.0260         |
| 20786          | Leucine rich repeat (in FLII) interacting protein 1 transcribed sequence with weak similarity to protein ref:NP_081764.1                                                                                                   | 0.552              | 0.0458         |
| 17348          | ( <i>M.musculus</i> ) RIKEN cDNA 5730493B19 [ <i>Mus musculus</i> ]                                                                                                                                                        | 0.551              | 0.0260         |
| 10855          | Ankyrin repeat domain 27 (VPS9 domain) Mus musculus transcribed sequence with strong similarity to protein sp:P11369 ( <i>M.musculus</i> ) POL2_MOUSE Retrovirus-related POL polyprotein                                   | 0.550              | 0.0365         |
| 12614          | [Contains: Reverse transcriptase ; Endonuclease]                                                                                                                                                                           | 0.548              | 0.0402         |
| 4471           | RIKEN cDNA A830055N07 gene                                                                                                                                                                                                 | 0.544              | 0.0402         |
| 9270           | ESTs AW550992                                                                                                                                                                                                              | 0.544              | 0.0402         |
| 17231          | ribosomal protein L39                                                                                                                                                                                                      | 0.543              | 0.0434         |
| 8517           | Suppressor of variegation 4-20 homolog 1 ( <i>Drosophila</i> )                                                                                                                                                             | 0.541              | 0.0458         |
| 2978           | ATPase, H <sup>+</sup> transporting, lysosomal accessory protein 2                                                                                                                                                         | 0.540              | 0.0402         |
| 9389           | DNA segment, Chr 11, ERATO Doi 497, expressed                                                                                                                                                                              | 0.539              | 0.0434         |
| 16185          | Neural precursor cell expressed, developmentally down-regulated gene 8                                                                                                                                                     | 0.537              | 0.0402         |
| 14950          | Nuclear autoantigenic sperm protein (histone-binding)                                                                                                                                                                      | 0.535              | 0.0365         |
| 346            | Activin receptor IIB L0006D07-3 NIA Mouse E12.5 Female Mesonephros and Gonads cDNA                                                                                                                                         | 0.530              | 0.0458         |
| 1436           | Library Mus musculus cDNA clone L0006D07 3', MRNA sequence                                                                                                                                                                 | 0.530              | 0.0458         |
| 2343           | Scavenger receptor class B, member 2                                                                                                                                                                                       | 0.528              | 0.0434         |

|       |                                                                                                                                                                             |       |        |
|-------|-----------------------------------------------------------------------------------------------------------------------------------------------------------------------------|-------|--------|
| 1874  | Toll interacting protein                                                                                                                                                    | 0.523 | 0.0402 |
| 18227 | Recombination activating gene 1                                                                                                                                             | 0.521 | 0.0402 |
| 7062  | apolipoprotein B editing complex 3                                                                                                                                          | 0.520 | 0.0402 |
|       | 12 days embryo female mullerian duct includes surrounding region cDNA,<br>RIKEN full-length enriched library, clone:6820436J05 product:unknown EST,<br>full insert sequence | 0.519 | 0.0434 |
| 9289  | full insert sequence                                                                                                                                                        | 0.519 | 0.0434 |
| 3415  | Malate dehydrogenase 1, NAD (soluble)                                                                                                                                       | 0.519 | 0.0337 |
| 8282  | ESTs BE824978                                                                                                                                                               | 0.515 | 0.0402 |
| 3203  | RNA binding motif protein 15                                                                                                                                                | 0.511 | 0.0337 |
| 9719  | Yippee-like 1 (Drosophila)                                                                                                                                                  | 0.506 | 0.0297 |
| 3380  | RIKEN cDNA 2210412B16 gene                                                                                                                                                  | 0.505 | 0.0260 |
| 9549  | RIKEN cDNA 1110032A13 gene                                                                                                                                                  | 0.503 | 0.0434 |
| 1184  | Wingless-related MMTV integration site 4                                                                                                                                    | 0.500 | 0.0458 |
| 6824  | SH3-domain binding protein 1                                                                                                                                                | 0.500 | 0.0301 |
| 3842  | G1 to S phase transition 1                                                                                                                                                  | 0.495 | 0.0458 |
| 4280  | EF hand domain containing 2                                                                                                                                                 | 0.494 | 0.0434 |
| 3312  | ESTs BG068561                                                                                                                                                               | 0.494 | 0.0237 |
| 4609  | ESTs BM224731                                                                                                                                                               | 0.491 | 0.0297 |
| 13821 | ESTs BI792213                                                                                                                                                               | 0.489 | 0.0365 |
|       | Protein phosphatase 2 (formerly 2A), regulatory subunit B (PR 52), beta<br>isoform                                                                                          | 0.488 | 0.0301 |
| 3840  | isoform                                                                                                                                                                     | 0.488 | 0.0301 |
| 2695  | Solute carrier family 41, member 3                                                                                                                                          | 0.486 | 0.0260 |
| 9485  | Inactive X specific transcripts                                                                                                                                             | 0.486 | 0.0434 |
| 1432  | Cytokine inducible SH2-containing protein                                                                                                                                   | 0.485 | 0.0301 |
|       | H3026G02-3 NIA Mouse 15K cDNA Clone Set Mus musculus cDNA clone                                                                                                             |       |        |
| 18255 | H3026G02 3', MRNA sequence                                                                                                                                                  | 0.485 | 0.0402 |
| 6678  | ESTs AW556832                                                                                                                                                               | 0.480 | 0.0337 |
|       | PREDICTED: Mus musculus similar to 1-aminocyclopropane-1-carboxylate<br>synthase (LOC381411), mRNA                                                                          | 0.479 | 0.0434 |
| 8734  | synthase (LOC381411), mRNA                                                                                                                                                  | 0.479 | 0.0434 |
| 528   | Zinc finger protein 148                                                                                                                                                     | 0.478 | 0.0458 |
| 10475 | Cadherin EGF LAG seven-pass G-type receptor 2                                                                                                                               | 0.475 | 0.0434 |
| 8507  | Hypothetical protein C130092E12                                                                                                                                             | 0.473 | 0.0434 |
| 6761  | Zinc finger CCCH type domain containing 8                                                                                                                                   | 0.471 | 0.0434 |
| 12675 | Unc-93 homolog B1 (C. elegans)                                                                                                                                              | 0.471 | 0.0365 |
| 5712  | Filamin, beta                                                                                                                                                               | 0.466 | 0.0297 |
| 8940  | Ral GEF with PH domain and SH3 binding motif 2                                                                                                                              | 0.463 | 0.0402 |
|       | Protein tyrosine phosphatase, receptor type, f polypeptide (PTPRF),<br>interacting protein (liprin), alpha 4                                                                | 0.463 | 0.0337 |
| 2104  | interacting protein (liprin), alpha 4                                                                                                                                       | 0.463 | 0.0337 |
| 3626  | Human immunodeficiency virus type I enhancer binding protein 3                                                                                                              | 0.462 | 0.0458 |
| 10890 | Potassium voltage-gated channel, delayed-rectifier, subfamily S, member 3                                                                                                   | 0.461 | 0.0458 |
| 9155  | Chromodomain helicase DNA binding protein 4                                                                                                                                 | 0.456 | 0.0365 |
| 1397  | ELOVL family member 6, elongation of long chain fatty acids (yeast)                                                                                                         | 0.456 | 0.0337 |
| 9622  | RIKEN cDNA 2900037I21 gene                                                                                                                                                  | 0.455 | 0.0402 |
| 7253  | Glycine decarboxylase                                                                                                                                                       | 0.452 | 0.0434 |
| 8675  | Neurotensin                                                                                                                                                                 | 0.448 | 0.0434 |
| 18887 | Rap guanine nucleotide exchange factor (GEF) 3                                                                                                                              | 0.446 | 0.0260 |
| 1635  | Hypothetical protein 4930565O14                                                                                                                                             | 0.444 | 0.0434 |
| 713   | Bone morphogenetic protein 5                                                                                                                                                | 0.441 | 0.0365 |
| 3311  | Nuclear factor I/A                                                                                                                                                          | 0.440 | 0.0365 |
| 2268  | Possibly intronic in U003771-H3150E04                                                                                                                                       | 0.439 | 0.0365 |
| 755   | RIKEN cDNA 2610507L03 gene                                                                                                                                                  | 0.437 | 0.0260 |
|       | transcribed sequence with strong similarity to protein pir:S12207 (M.musculus)                                                                                              |       |        |
| 5727  | S12207 hypothetical protein (B2 element) - mouse                                                                                                                            | 0.435 | 0.0260 |
| 3317  | RAD51-like 1 (S. cerevisiae)                                                                                                                                                | 0.434 | 0.0337 |



|       |                                                                                                                                                                                                                                                                                |       |        |
|-------|--------------------------------------------------------------------------------------------------------------------------------------------------------------------------------------------------------------------------------------------------------------------------------|-------|--------|
| 828   | Aldehyde dehydrogenase 18 family, member A1                                                                                                                                                                                                                                    | 0.431 | 0.0402 |
| 1992  | C0643G01-3 NIA Mouse Trophoblast Stem Cell cDNA Library (Long) Mus musculus cDNA clone NIA:C0643G01 IMAGE:30024360 3', MRNA sequence transcribed sequence with weak similarity to protein pir:S60466 (D.melanogaster) S60466 transposase - fruit fly (Drosophila melanogaster) | 0.430 | 0.0402 |
| 989   | transposon element S                                                                                                                                                                                                                                                           | 0.423 | 0.0337 |
| 2923  | RIKEN cDNA 3110050N22 gene                                                                                                                                                                                                                                                     | 0.421 | 0.0337 |
| 2373  | Poly A binding protein, cytoplasmic 1                                                                                                                                                                                                                                          | 0.415 | 0.0260 |
| 18758 | SPARC-like 1 (mast9, hevin)                                                                                                                                                                                                                                                    | 0.414 | 0.0402 |
| 6219  | 1-acylglycerol-3-phosphate O-acyltransferase 3                                                                                                                                                                                                                                 | 0.412 | 0.0402 |
| 2982  | RIKEN cDNA 1810063B07 gene                                                                                                                                                                                                                                                     | 0.409 | 0.0434 |
| 1633  | ESTs AU024244                                                                                                                                                                                                                                                                  | 0.409 | 0.0434 |
| 761   | ESTs BG074061                                                                                                                                                                                                                                                                  | 0.408 | 0.0434 |
| 2857  | Transcription factor 7, T-cell specific                                                                                                                                                                                                                                        | 0.406 | 0.0458 |
| 1618  | Diaphanous homolog 3 (Drosophila)                                                                                                                                                                                                                                              | 0.405 | 0.0434 |
| 1705  | Protein tyrosine phosphatase-like (proline instead of catalytic arginine), member b                                                                                                                                                                                            | 0.405 | 0.0297 |
| 1357  | RIKEN cDNA 1700129O19 gene                                                                                                                                                                                                                                                     | 0.404 | 0.0434 |
| 1062  | GATA binding protein 1                                                                                                                                                                                                                                                         | 0.403 | 0.0301 |
| 5513  | Mitochondrial ribosomal protein L15                                                                                                                                                                                                                                            | 0.403 | 0.0402 |
| 10348 | L0053H05-3 NIA Mouse E12.5 Female Mesonephros and Gonads cDNA Library Mus musculus cDNA clone L0053H05 3', MRNA sequence                                                                                                                                                       | 0.403 | 0.0237 |
| 9734  | Hypothetical protein D030063E12                                                                                                                                                                                                                                                | 0.403 | 0.0260 |
| 525   | UNKNOWN C0455C10                                                                                                                                                                                                                                                               | 0.401 | 0.0365 |
| 1272  | Yippee-like 1 (Drosophila)                                                                                                                                                                                                                                                     | 0.400 | 0.0402 |
| 17461 | Retinitis pigmentosa GTPase regulator interacting protein 1                                                                                                                                                                                                                    | 0.398 | 0.0365 |
| 18008 | transcription factor 7-like 2, T-cell specific, HMG-box                                                                                                                                                                                                                        | 0.395 | 0.0237 |
| 8074  | Prickle-like 2 (Drosophila)                                                                                                                                                                                                                                                    | 0.394 | 0.0301 |
| 1786  | AU021859 Mouse unfertilized egg cDNA Mus musculus cDNA clone J0403C04 3', MRNA sequence                                                                                                                                                                                        | 0.394 | 0.0434 |
| 3005  | ESTs BM115366                                                                                                                                                                                                                                                                  | 0.392 | 0.0458 |
| 2704  | RIKEN cDNA 5330431K02 gene                                                                                                                                                                                                                                                     | 0.390 | 0.0402 |
| 20586 | SET and MYND domain containing 3                                                                                                                                                                                                                                               | 0.390 | 0.0402 |
| 8210  | SET and MYND domain containing 1                                                                                                                                                                                                                                               | 0.389 | 0.0260 |
| 1056  | Replication factor C (activator 1) 4                                                                                                                                                                                                                                           | 0.388 | 0.0402 |
| 3178  | Glucosidase, alpha; neutral C                                                                                                                                                                                                                                                  | 0.388 | 0.0365 |
| 411   | H3062A06-3 NIA Mouse 15K cDNA Clone Set Mus musculus cDNA clone H3062A06 3', MRNA sequence                                                                                                                                                                                     | 0.387 | 0.0301 |
| 3552  | ESTs BG075092                                                                                                                                                                                                                                                                  | 0.384 | 0.0434 |
| 333   | Forkhead box N2                                                                                                                                                                                                                                                                | 0.384 | 0.0365 |
| 2288  | C0902B10-3 NIA Mouse 12.5-dpc Male Genital Ridge/Mesonephros cDNA Library (Long) Mus musculus cDNA clone NIA:C0902B10 IMAGE:30034773 3', MRNA sequence                                                                                                                         | 0.383 | 0.0365 |
| 2278  | ATPase, class VI, type 11A                                                                                                                                                                                                                                                     | 0.381 | 0.0365 |
| 6451  | ESTs BG073007                                                                                                                                                                                                                                                                  | 0.377 | 0.0264 |
| 1134  | Protein tyrosine phosphatase, receptor type Z, polypeptide 1                                                                                                                                                                                                                   | 0.373 | 0.0365 |
| 802   | Glypican 6                                                                                                                                                                                                                                                                     | 0.372 | 0.0297 |
| 1604  | Protein kinase, DNA activated, catalytic polypeptide                                                                                                                                                                                                                           | 0.370 | 0.0260 |
| 4638  | RIKEN cDNA 9130005N14 gene                                                                                                                                                                                                                                                     | 0.370 | 0.0337 |
| 3427  | ESTs AU018515                                                                                                                                                                                                                                                                  | 0.368 | 0.0434 |
| 2334  | WW domain-containing oxidoreductase                                                                                                                                                                                                                                            | 0.366 | 0.0458 |
| 1399  | RIKEN cDNA A830025P08 gene                                                                                                                                                                                                                                                     | 0.363 | 0.0365 |
| 3126  | Excision repair cross-complementing rodent repair deficiency, complementation group 5                                                                                                                                                                                          | 0.363 | 0.0297 |

|       |                                                                        |       |        |
|-------|------------------------------------------------------------------------|-------|--------|
| 539   | Hypothetical protein D230050A05                                        | 0.361 | 0.0402 |
| 540   | Melanoma antigen, family L, 2                                          | 0.361 | 0.0365 |
| 999   | ESTs BM219361                                                          | 0.359 | 0.0260 |
| 1808  | ESTs BM220406                                                          | 0.357 | 0.0402 |
| 1852  | Nuclear cap binding protein subunit 2                                  | 0.357 | 0.0402 |
| 1423  | RIKEN cDNA A230083H22 gene                                             | 0.357 | 0.0402 |
| 1053  | Methyl-CpG binding domain protein 4                                    | 0.355 | 0.0434 |
| 1182  | Zinc finger, CSL domain containing 2                                   | 0.351 | 0.0365 |
| 1461  | PEST-containing nuclear protein                                        | 0.347 | 0.0237 |
| 209   | Brain and reproductive organ-expressed protein                         | 0.347 | 0.0402 |
| 414   | Guanine nucleotide binding protein (G protein), gamma 2 subunit        | 0.346 | 0.0402 |
| 349   | Expressed sequence AW121567                                            | 0.346 | 0.0402 |
|       | UNKNOWN: Similar to Mus musculus hypothetical gene supported by        |       |        |
| 1452  | NM_009444 (LOC232090), mRNA                                            | 0.346 | 0.0365 |
| 2561  | Transmembrane protein 30B                                              | 0.345 | 0.0402 |
| 4668  | Myocyte enhancer factor 2C                                             | 0.344 | 0.0402 |
| 4621  | UNKNOWN L0858B11                                                       | 0.342 | 0.0365 |
| 541   | Cadherin 8                                                             | 0.341 | 0.0458 |
| 3838  | Tripartite motif-containing 35                                         | 0.340 | 0.0434 |
| 3089  | Ca <sup>2+</sup> dependent activator protein for secretion             | 0.339 | 0.0434 |
| 2132  | RIKEN cDNA 2810423E13 gene                                             | 0.339 | 0.0402 |
| 573   | ESTs AU024201                                                          | 0.339 | 0.0434 |
| 1156  | RIKEN cDNA 2410198H06 gene                                             | 0.338 | 0.0337 |
| 1428  | ESTs AW554277                                                          | 0.336 | 0.0402 |
| 843   | Butyrylcholinesterase                                                  | 0.335 | 0.0402 |
| 837   | RIKEN cDNA 9530010C24 gene                                             | 0.331 | 0.0402 |
| 1454  | Neural precursor cell expressed, developmentally down-regulated gene 4 | 0.330 | 0.0190 |
|       | EST01205 Mouse 7.5 dpc embryo ectoplacental cone cDNA library Mus      |       |        |
| 3054  | musculus cDNA clone C0007A11 3', MRNA sequence                         | 0.329 | 0.0264 |
| 3076  | Deafness, autosomal dominant 5 homolog (human)                         | 0.329 | 0.0434 |
| 6756  | LUC7-like 2 ( <i>S. cerevisiae</i> )                                   | 0.328 | 0.0237 |
|       | L0052A03-3 NIA Mouse E12.5 Female Mesonephros and Gonads cDNA          |       |        |
| 2903  | Library Mus musculus cDNA clone L0052A03 3', MRNA sequence             | 0.327 | 0.0301 |
| 2102  | Formin binding protein 1                                               | 0.327 | 0.0365 |
| 2294  | DNA segment, Chr 18, ERATO Doi 653, expressed                          | 0.325 | 0.0402 |
| 18660 | Solute carrier family 38, member 4                                     | 0.325 | 0.0365 |
| 2262  | ESTs AU021139                                                          | 0.324 | 0.0301 |
| 774   | Transcription elongation factor B (SIII), polypeptide 2                | 0.323 | 0.0402 |
| 1194  | RIKEN cDNA 4933426M11 gene                                             | 0.322 | 0.0237 |
| 970   | Mitochondrial transcription termination factor 1                       | 0.321 | 0.0434 |
| 1261  | DNA segment, Chr 8, ERATO Doi 738, expressed                           | 0.320 | 0.0434 |
| 961   | ESTs BG069001                                                          | 0.318 | 0.0434 |
| 1440  | CDC14 cell division cycle 14 homolog B ( <i>S. cerevisiae</i> )        | 0.318 | 0.0365 |
| 20231 | RIKEN cDNA 4932435O22 gene                                             | 0.317 | 0.0402 |
| 1043  | RIKEN cDNA 1110037F02 gene                                             | 0.317 | 0.0237 |
| 729   | Twisted gastrulation homolog 1 ( <i>Drosophila</i> )                   | 0.317 | 0.0402 |
| 2505  | Fibroblast growth factor 9                                             | 0.317 | 0.0337 |
| 1060  | RIKEN cDNA E430034C17 gene                                             | 0.314 | 0.0365 |
| 1880  | CDNA sequence BC016226                                                 | 0.310 | 0.0402 |
| 134   | hydroxysteroid (17-beta) dehydrogenase 7                               | 0.309 | 0.0365 |
| 836   | Apoptosis antagonizing transcription factor                            | 0.308 | 0.0260 |
| 5031  | Mitofusin 1                                                            | 0.307 | 0.0434 |
| 1185  | RIKEN cDNA E430026A01 gene                                             | 0.306 | 0.0301 |
| 348   | K0439F11-5N NIA Mouse Mesenchymal Stem Cell cDNA Library (Long) Mus    | 0.305 | 0.0434 |

|       |                                                                          |       |        |
|-------|--------------------------------------------------------------------------|-------|--------|
|       | musculus cDNA clone NIA:K0439F11 IMAGE:30062854 5', MRNA sequence        |       |        |
|       | Mus musculus transcribed sequence with weak similarity to protein        |       |        |
| 799   | ref:NP_083693.1 (M.musculus) RIKEN cDNA 9030605E16 [Mus musculus]        | 0.304 | 0.0402 |
| 757   | Glutamate receptor, ionotropic, AMPA1 (alpha 1)                          | 0.304 | 0.0301 |
| 1359  | RIKEN cDNA 3110001I22 gene                                               | 0.302 | 0.0365 |
| 1481  | Metastasis associated 3                                                  | 0.300 | 0.0402 |
| 2323  | Aspartate-beta-hydroxylase                                               | 0.297 | 0.0365 |
| 317   | Protein tyrosine phosphatase, non-receptor type 3                        | 0.297 | 0.0301 |
|       | transcribed sequence with weak similarity to protein ref:NP_081764.1     |       |        |
| 1869  | (M.musculus) RIKEN cDNA 5730493B19 [Mus musculus]                        | 0.296 | 0.0402 |
| 7852  | RIKEN cDNA 5830411K21 gene                                               | 0.296 | 0.0301 |
| 1166  | Cleavage and polyadenylation specific factor 5                           | 0.296 | 0.0458 |
| 1013  | ESTs BG074637                                                            | 0.295 | 0.0402 |
| 8296  | RIKEN cDNA G430041M01 gene                                               | 0.294 | 0.0402 |
| 2775  | RIKEN cDNA 1700023F20 gene                                               | 0.293 | 0.0402 |
| 1198  | Ras-related GTP binding D                                                | 0.292 | 0.0402 |
| 626   | Transducin-like enhancer of split 6, homolog of Drosophila E(spl)        | 0.290 | 0.0297 |
| 2078  | Signal transducing adaptor molecule (SH3 domain and ITAM motif) 2        | 0.290 | 0.0337 |
| 1636  | Early B-cell factor 1                                                    | 0.290 | 0.0402 |
| 1782  | Zinc finger protein 238                                                  | 0.289 | 0.0365 |
| 1163  | ESTs BM239152                                                            | 0.288 | 0.0260 |
| 1675  | Expressed sequence AA408296                                              | 0.287 | 0.0297 |
| 2049  | Chaperonin subunit 3 (gamma)                                             | 0.285 | 0.0297 |
|       | Mus musculus transcribed sequence with weak similarity to protein        |       |        |
| 143   | ref:NP_079268.1 (H.sapiens) hypothetical protein FLJ12547 [Homo sapiens] | 0.281 | 0.0297 |
| 1154  | Carbonic anhydrase 12                                                    | 0.280 | 0.0365 |
| 4193  | Mitochondrial ribosomal protein S25                                      | 0.279 | 0.0402 |
| 308   | EH-domain containing 4                                                   | 0.276 | 0.0402 |
| 1243  | Transmembrane protein 45a                                                | 0.274 | 0.0337 |
|       | transcribed sequence with weak similarity to protein ref:NP_081764.1     |       |        |
| 2286  | (M.musculus) RIKEN cDNA 5730493B19 [Mus musculus]                        | 0.271 | 0.0402 |
| 1129  | Empty spiracles homolog 2 (Drosophila)                                   | 0.271 | 0.0434 |
| 3855  | Expressed sequence AA536749                                              | 0.268 | 0.0337 |
| 1770  | RIKEN cDNA 4833405L11 gene                                               | 0.265 | 0.0301 |
| 2210  | Homeo box B1                                                             | 0.265 | 0.0365 |
| 763   | RIKEN cDNA C030032C09 gene                                               | 0.264 | 0.0337 |
| 758   | LPS-responsive beige-like anchor                                         | 0.263 | 0.0237 |
| 5106  | Cytochrome P450, family 51                                               | 0.257 | 0.0337 |
| 3376  | PRP18 pre-mRNA processing factor 18 homolog (yeast)                      | 0.256 | 0.0365 |
| 4599  | DNA methyltransferase 3B                                                 | 0.254 | 0.0260 |
| 7215  | Bone morphogenetic protein receptor, type 1A                             | 0.251 | 0.0337 |
| 2571  | Guanine nucleotide binding protein, alpha inhibiting 1                   | 0.249 | 0.0402 |
| 13724 | MAD homolog 2 (Drosophila)                                               | 0.247 | 0.0297 |
| 2081  | expressed sequence AI504298                                              | 0.246 | 0.0365 |
| 5497  | Carbonic anhydrase 12                                                    | 0.246 | 0.0337 |
| 279   | Spindlin-like                                                            | 0.244 | 0.0458 |
| 1819  | DNA fragmentation factor, beta subunit                                   | 0.243 | 0.0260 |
| 3541  | RIKEN cDNA 6430511E19 gene                                               | 0.236 | 0.0337 |
| 742   | ESTs BM117069                                                            | 0.234 | 0.0365 |
| 2771  | RIKEN cDNA C130002M15 gene                                               | 0.232 | 0.0458 |
| 1271  | KH domain containing, RNA binding, signal transduction associated 2      | 0.231 | 0.0237 |
| 4933  | SRY-box containing gene 2                                                | 0.231 | 0.0337 |
| 2441  | miRNA containing gene                                                    | 0.227 | 0.0337 |
| 416   | Expressed sequence AI427122                                              | 0.227 | 0.0402 |

|       |                                                                                                                                                                                                                                   |       |        |
|-------|-----------------------------------------------------------------------------------------------------------------------------------------------------------------------------------------------------------------------------------|-------|--------|
| 286   | ESTs BG069306                                                                                                                                                                                                                     | 0.227 | 0.0402 |
| 300   | Similar to Cpo protein                                                                                                                                                                                                            | 0.225 | 0.0402 |
| 1862  | V-abl Abelson murine leukemia viral oncogene 2 (arg, Abelson-related gene)                                                                                                                                                        | 0.224 | 0.0264 |
| 1877  | RIKEN cDNA 2610528E23 gene                                                                                                                                                                                                        | 0.223 | 0.0402 |
| 2697  | RIKEN cDNA 0610008C08 gene                                                                                                                                                                                                        | 0.223 | 0.0301 |
| 3187  | Autism susceptibility candidate 2                                                                                                                                                                                                 | 0.220 | 0.0402 |
| 1228  | Mus musculus 12 days embryo spinal cord cDNA, RIKEN full-length enriched library, clone:C530045K13 product:unknown EST, full insert sequence.                                                                                     | 0.218 | 0.0260 |
| 1687  | Calcium channel, voltage-dependent, alpha2/delta subunit 3                                                                                                                                                                        | 0.216 | 0.0301 |
| 1784  | cytochrome c oxidase subunit VIb, testes-specific                                                                                                                                                                                 | 0.214 | 0.0365 |
| 1812  | C0258F06-3 NIA Mouse 7.5-dpc Whole Embryo cDNA Library (Long) Mus musculus cDNA clone C0258F06 3', MRNA sequence                                                                                                                  | 0.212 | 0.0337 |
| 3943  | Expressed sequence AU017263                                                                                                                                                                                                       | 0.209 | 0.0260 |
| 292   | RIKEN cDNA 1300013J15 gene                                                                                                                                                                                                        | 0.209 | 0.0402 |
| 4040  | RIKEN cDNA 4930447C04 gene                                                                                                                                                                                                        | 0.209 | 0.0260 |
| 2257  | similar to RIKEN cDNA 1700001E04 (LOC380911), mRNA                                                                                                                                                                                | 0.206 | 0.0260 |
| 74    | RIKEN cDNA 1810042K04 gene                                                                                                                                                                                                        | 0.202 | 0.0402 |
| 1351  | Sal-like 1 (Drosophila)                                                                                                                                                                                                           | 0.200 | 0.0337 |
| 4496  | Insulin-like growth factor 2 receptor                                                                                                                                                                                             | 0.198 | 0.0434 |
| 726   | Peroxisome proliferator activated receptor gamma                                                                                                                                                                                  | 0.193 | 0.0434 |
| 13198 | Solute carrier family 8 (sodium/calcium exchanger), member 1                                                                                                                                                                      | 0.193 | 0.0402 |
| 2958  | Zinc finger protein 96                                                                                                                                                                                                            | 0.192 | 0.0260 |
| 2731  | MYST histone acetyltransferase 1                                                                                                                                                                                                  | 0.188 | 0.0301 |
| 613   | RIKEN cDNA 0610007N19 gene                                                                                                                                                                                                        | 0.186 | 0.0301 |
| 2059  | ESTs BG073657                                                                                                                                                                                                                     | 0.185 | 0.0434 |
| 724   | RIKEN cDNA 1700020C11 gene                                                                                                                                                                                                        | 0.184 | 0.0458 |
| 3210  | Sestrin 3                                                                                                                                                                                                                         | 0.181 | 0.0260 |
| 2277  | CDNA sequence BC048546                                                                                                                                                                                                            | 0.181 | 0.0260 |
| 1430  | Glutamate receptor, metabotropic 7                                                                                                                                                                                                | 0.179 | 0.0260 |
| 1487  | Transmembrane protein 5                                                                                                                                                                                                           | 0.171 | 0.0365 |
| 534   | Sorting nexin 2                                                                                                                                                                                                                   | 0.167 | 0.0260 |
| 310   | DNA segment, Chr 18, ERATO Doi 653, expressed                                                                                                                                                                                     | 0.158 | 0.0260 |
| 1269  | Transmembrane emp24 protein transport domain containing 9                                                                                                                                                                         | 0.158 | 0.0260 |
| 2693  | RIKEN cDNA A730042J05 gene                                                                                                                                                                                                        | 0.157 | 0.0365 |
| 1240  | Paired box gene 6                                                                                                                                                                                                                 | 0.156 | 0.0337 |
| 4679  | PR domain containing 16                                                                                                                                                                                                           | 0.154 | 0.0402 |
| 1779  | RIKEN cDNA D430039N05 gene                                                                                                                                                                                                        | 0.154 | 0.0337 |
| 2751  | Anaphase promoting complex subunit 4                                                                                                                                                                                              | 0.152 | 0.0237 |
| 116   | protocadherin 7                                                                                                                                                                                                                   | 0.150 | 0.0264 |
| 620   | Ubiquitin specific protease 1                                                                                                                                                                                                     | 0.150 | 0.0402 |
| 1645  | Nuclear factor of activated T-cells 5                                                                                                                                                                                             | 0.147 | 0.0260 |
| 7003  | DNA segment, Chr 11, ERATO Doi 686, expressed                                                                                                                                                                                     | 0.144 | 0.0301 |
| 2307  | Hypothetical protein A730046J16                                                                                                                                                                                                   | 0.140 | 0.0260 |
| 1478  | Chemokine-like factor super family 4                                                                                                                                                                                              | 0.137 | 0.0402 |
| 2335  | Mus musculus transcribed sequence with strong similarity to protein pir:S12207 (M.musculus) S12207 hypothetical protein (B2 element) - mouse Transcribed locus, weakly similar to NP_523817.1 CG9888-PA [Drosophila melanogaster] | 0.137 | 0.0365 |
| 3850  | L0009G02-3 NIA Mouse E12.5 Female Mesonephros and Gonads cDNA Library Mus musculus cDNA clone L0009G02 3', MRNA sequence                                                                                                          | 0.130 | 0.0365 |
| 1021  | Library Mus musculus cDNA clone L0009G02 3', MRNA sequence                                                                                                                                                                        | 0.124 | 0.0301 |
| 1486  | Pleckstrin homology-like domain, family B, member 2                                                                                                                                                                               | 0.071 | 0.0260 |



**Supplemental Table III.** Functional analysis of transcriptional profiling data.

| <b>Upregulated</b>                                                                 |                   |                |
|------------------------------------------------------------------------------------|-------------------|----------------|
| <b>Functional Category</b>                                                         | <b># of genes</b> | <b>p-value</b> |
| establishment of localization                                                      | 173               | 0.00000        |
| nucleotide binding                                                                 | 141               | 0.00002        |
| transferase activity                                                               | 125               | 0.00002        |
| RNA metabolism                                                                     | 39                | 0.00021        |
| macromolecule biosynthesis                                                         | 50                | 0.00042        |
| translation regulator activity                                                     | 16                | 0.00055        |
| vesicle-mediated transport                                                         | 39                | 0.00091        |
| cell cycle                                                                         | 23                | 0.00112        |
| WD-40 repeat                                                                       | 30                | 0.00115        |
| nucleocytoplasmic transport                                                        | 13                | 0.00200        |
| ATPase activity                                                                    | 22                | 0.00282        |
| HELICc                                                                             | 15                | 0.00282        |
| protein complex assembly                                                           | 14                | 0.00537        |
| hydrolase activity, acting on acid anhydrides, in phosphorus-containing anhydrides | 37                | 0.00676        |
| ligase activity                                                                    | 34                | 0.00724        |
| ubiquitin cycle                                                                    | 31                | 0.00724        |
| transit peptide                                                                    | 21                | 0.00813        |
| proteolysis                                                                        | 34                | 0.01023        |
| Pleckstrin homology-type                                                           | 25                | 0.01047        |
| enzyme regulator activity                                                          | 34                | 0.01047        |
| cytoskeletal protein binding                                                       | 25                | 0.02291        |
| transferase activity, transferring acyl groups                                     | 16                | 0.03162        |
| nuclease activity                                                                  | 15                | 0.03236        |
| lipoprotein metabolism                                                             | 7                 | 0.03981        |
| <b>Downregulated</b>                                                               |                   |                |
| <b>Functional Category</b>                                                         | <b># of genes</b> | <b>p-value</b> |
| development                                                                        | 37                | 0.01479        |
| cell differentiation                                                               | 19                | 0.01479        |
| pattern specification                                                              | 9                 | 0.03715        |
| TGF-BETA SIGNALING PATHWAY                                                         | 4                 | 0.03715        |
| cell fate commitment                                                               | 6                 | 0.03715        |
| WNT SIGNALING PATHWAY                                                              | 6                 | 0.04786        |

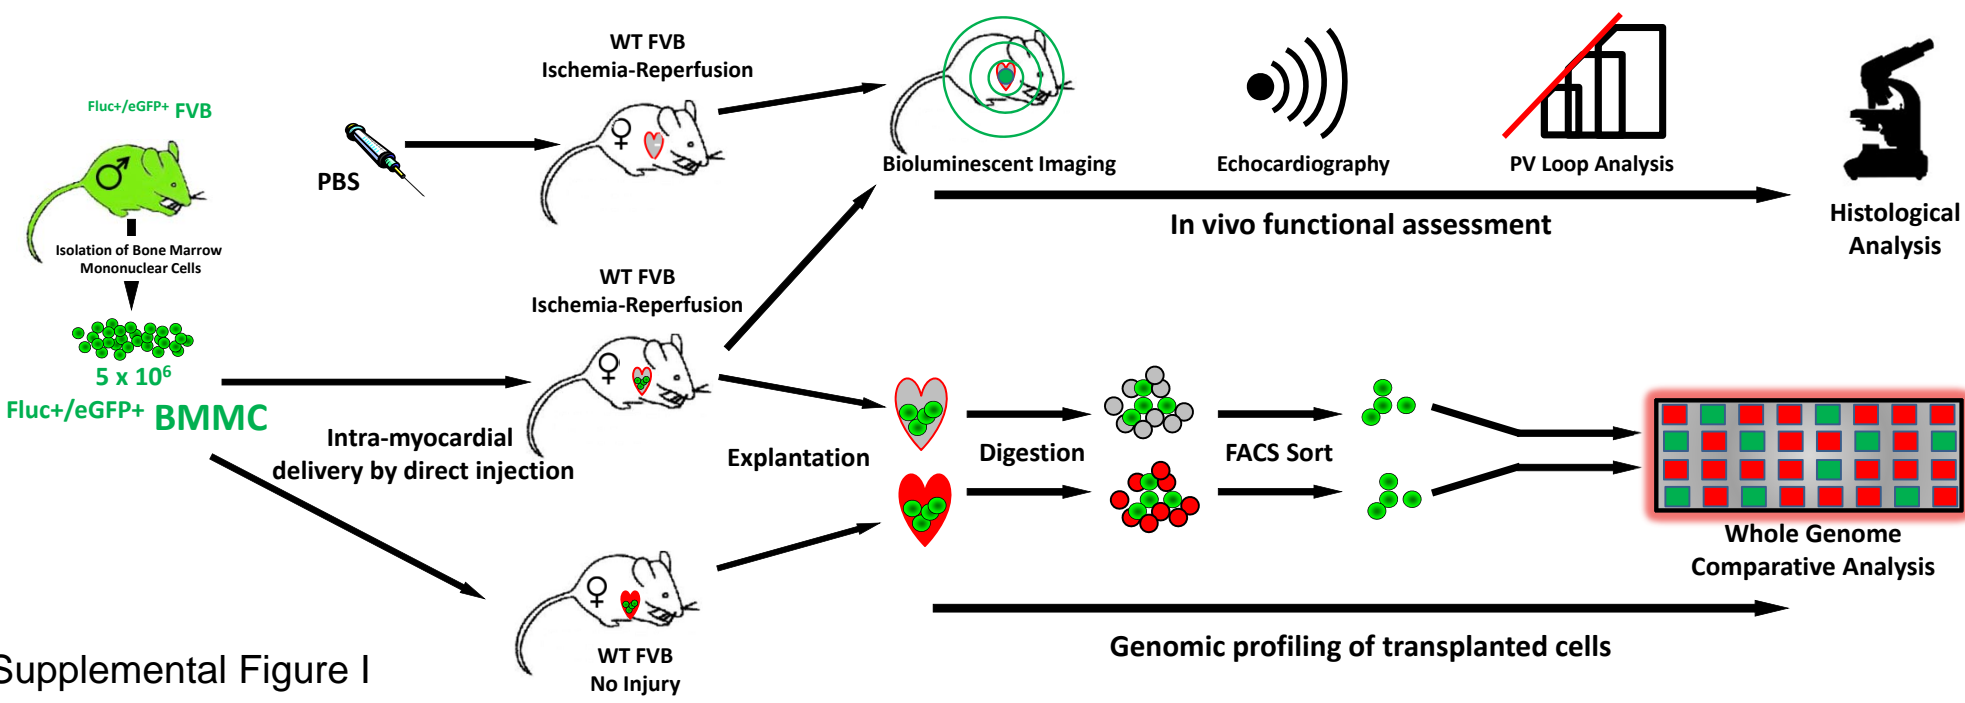

Supplemental Figure I

**A**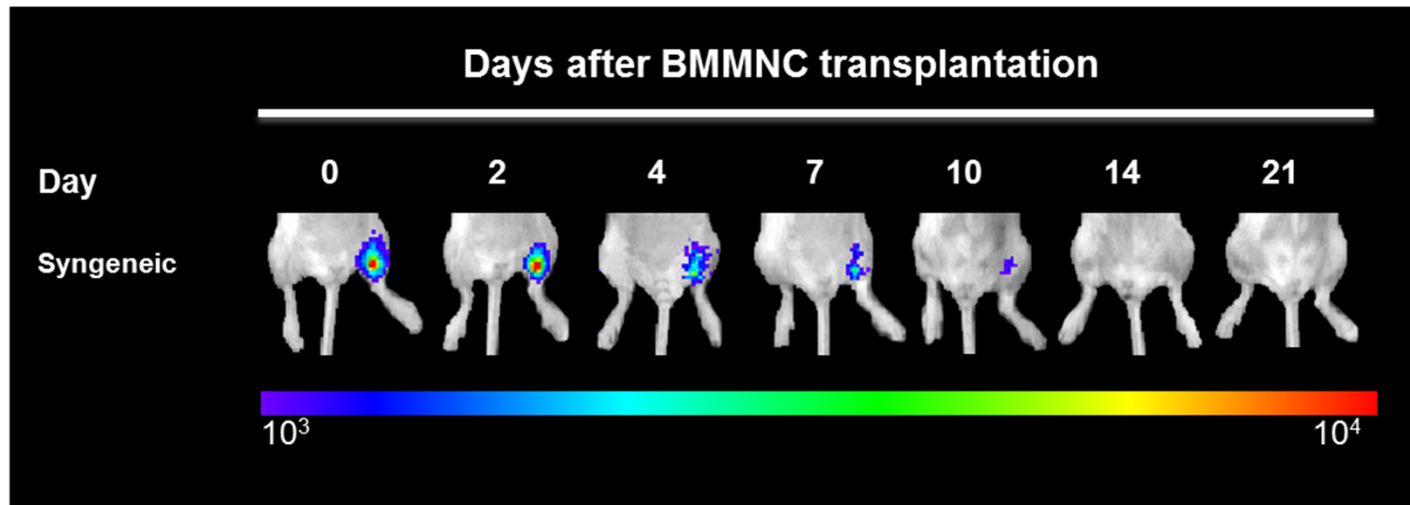**B**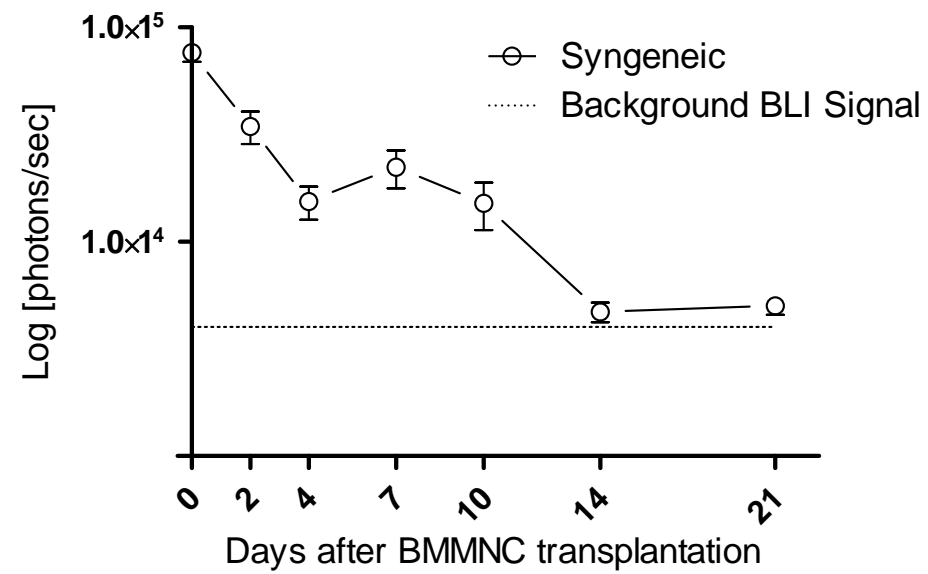



**A**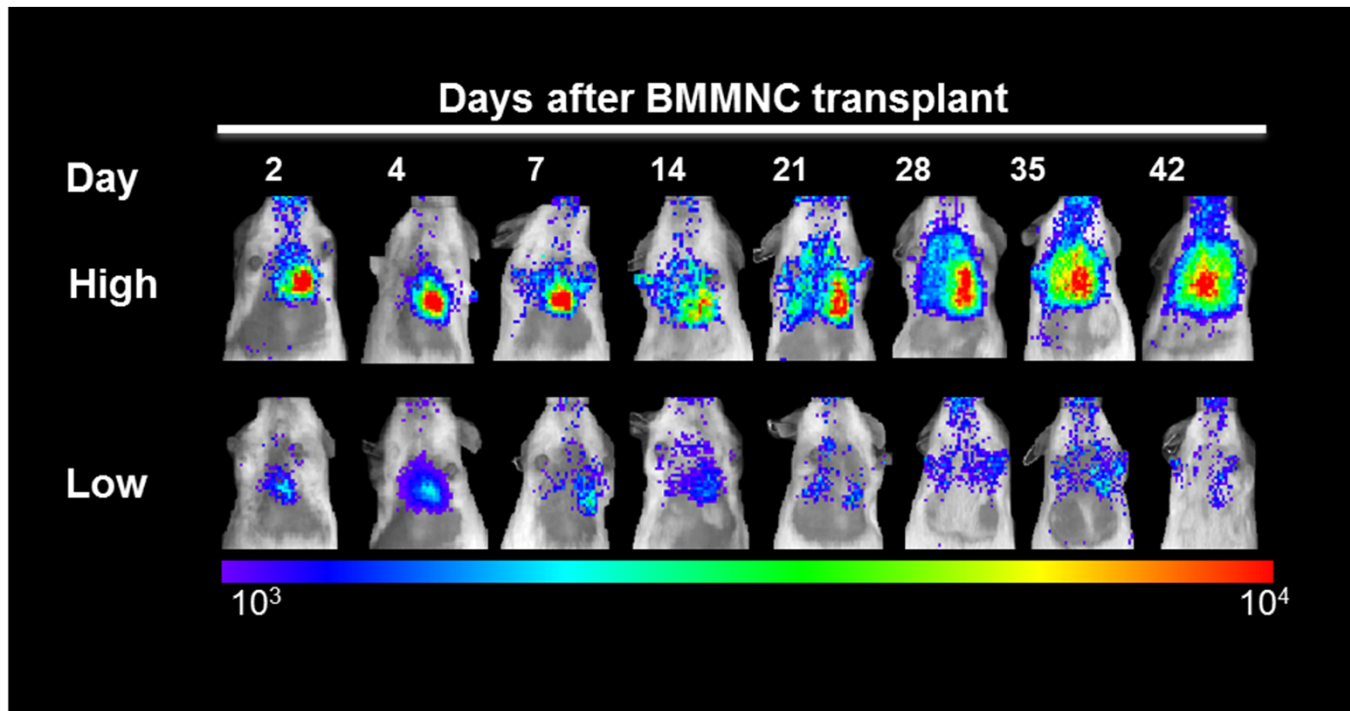**B**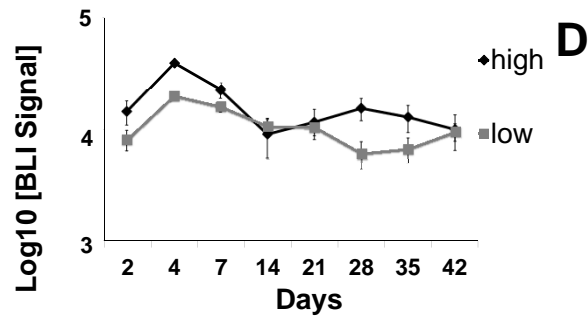**D**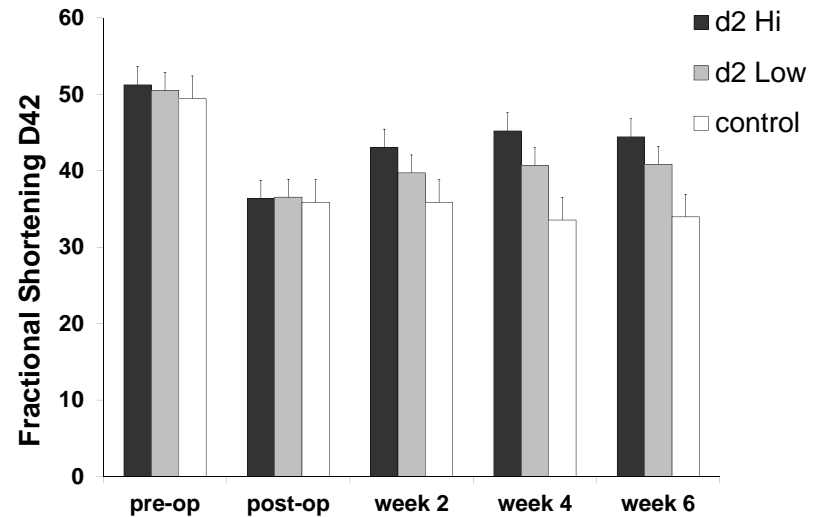**C**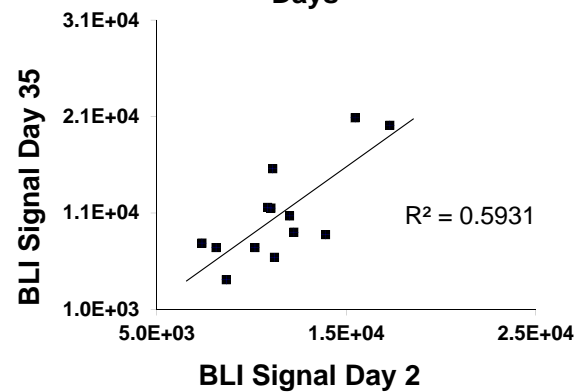

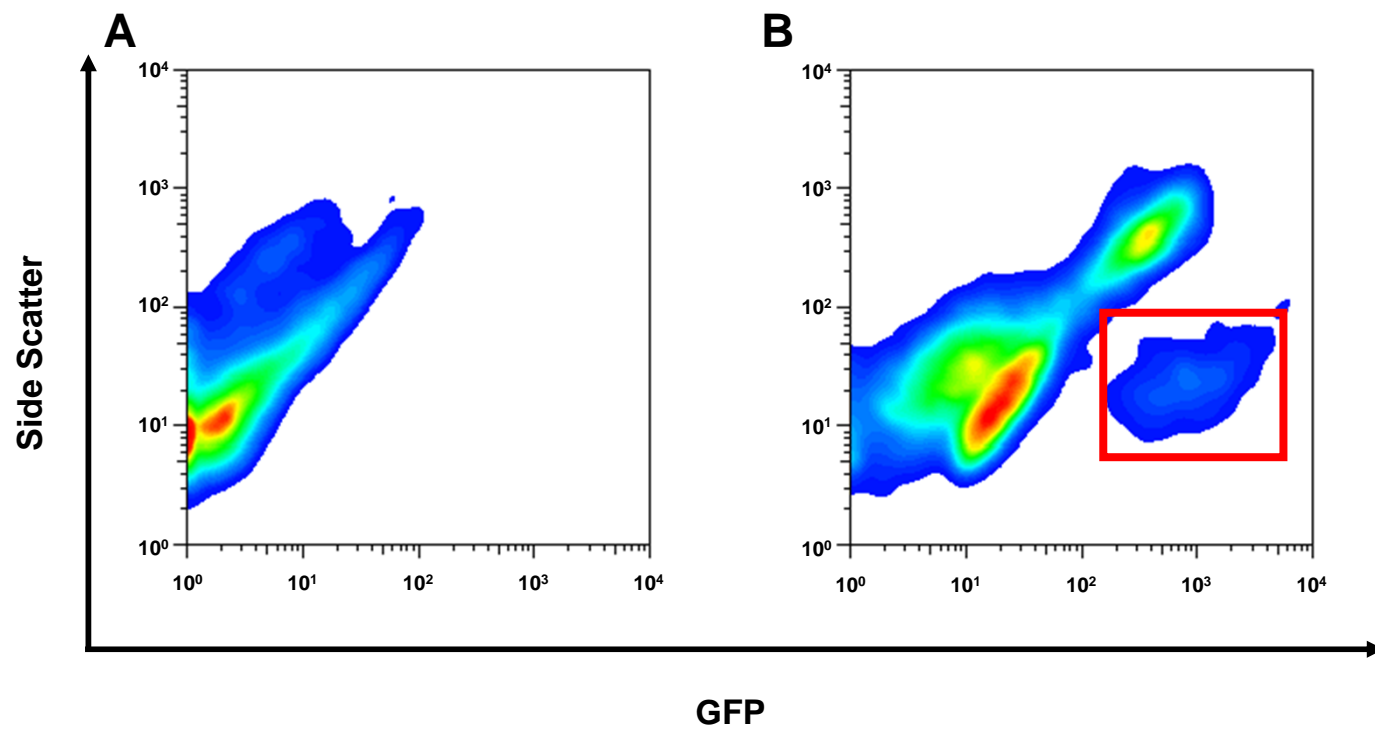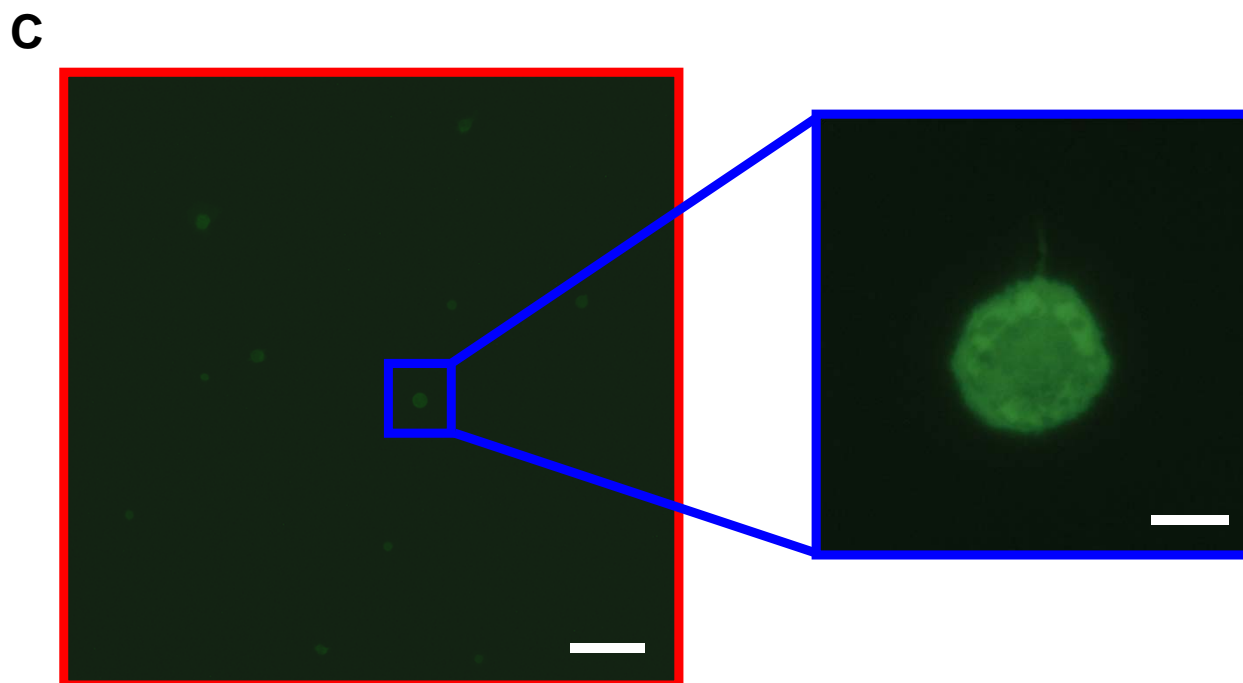

Supplemental Figure IV
